1 **Efficient GNE myopathy disease modeling with mutation specific phenotypes in**  
2 **human pluripotent stem cells by base editors**

3 Running title: Mutation specific GNE modeling by BEs

4 Ju-Chan Park<sup>1\*</sup>, Jumeo Kim<sup>1\*</sup>, Hyun-Ki Jang<sup>2,6</sup>, Seung-Yeon Lee<sup>1</sup>, Keun-Tae Kim<sup>1</sup>,  
5 Seokwoo Park<sup>3</sup>, Hyun Sik Lee<sup>4</sup>, Hee-Jung Choi<sup>4</sup>, Soon-Jung Park<sup>5</sup>, Sung-Hwan Moon<sup>5</sup>,  
6 Sangsu Bae<sup>2,6</sup> and Hyuk-Jin Cha<sup>1#</sup>

7

8 <sup>1</sup>College of Pharmacy, Seoul National University, Seoul, Republic of Korea, <sup>2</sup>Institute  
9 for Convergence of Basic Sciences, Hanyang University, Seoul, Republic of Korea,  
10 <sup>3</sup>Department of Biomedical Sciences, Seoul National University College of Medicine,  
11 Seoul, South Korea, <sup>4</sup>Department of Biological Sciences, Seoul National University  
12 College of Medicine, Seoul, South Korea, <sup>5</sup>Stem Cell Research Institute, T&R Biofab  
13 Co. Ltd, Siheung, Republic of Korea, <sup>6</sup>Department of Chemistry, Hanyang University,  
14 Seoul, Republic of Korea

15

16 \* These authors contributed equally

17

18 # To whom correspondence should be addressed to

19 Prof. Hyuk-Jin Cha, Ph.D.

20 College of Pharmacy, Seoul National University

21 1 Gwanak-ro, Gwanak-gu, Seoul 08826, Republic of Korea

22 Tel.: +82-2-880-7825; Fax: +82-2-880-9122; E-mail: [hjcha93@snu.ac.kr](mailto:hjcha93@snu.ac.kr)

23

24 **Keywords:** Gene editing, Base editor, human pluripotent stem cells, disease modeling,  
25 GNE myopathy, hypo-sialylation

26

1    **Abstract**

2            Isogenic pairs of cell lines derived from human pluripotent stem cells (hPSCs)  
3    enable the precise assessment of mutation-specific phenotypes through differentiation  
4    to target cells, as this method of disease modeling excludes the bias of genetic variation.  
5    However, the extremely low efficiency of precise gene editing based on homology-  
6    directed repair (HDR) with Cas9 in hPSCs remains a technical hurdle for this approach.  
7    Herein, we took advantage of currently available base editors (BEs) in hPSCs to  
8    epitomize the isogenic disease model from hPSCs with a pathophysiological indicator.  
9    Using this method, we established 14 hPSCs that harbor point mutations on the *GNE*  
10   gene, including four different mutations found in *GNE* myopathy patients. Because BEs  
11   activated p53 to a lesser degree than Cas9, we observed a higher editing efficiency with  
12   BEs. Four different mutations in the epimerase or kinase domains of *GNE* revealed  
13   mutation-specific hyposialylation, which was closely correlated to pathological clinical  
14   phenotypes. These mutation-specific hyposialylation patterns were evident in *GNE*  
15   protein structure modeling. Furthermore, treatment with a drug candidate currently  
16   under clinical trials showed a mutation-specific drug response in *GNE* myopathy  
17   disease models. These data suggest that isogenic disease models from hPSCs using BEs  
18   could serve as a useful tool for mimicking the pathophysiology of *GNE* myopathy and  
19   for predicting drug responses.

20

21

## 1 **Introduction**

2           Since the establishment of induced pluripotent stem cells (iPSCs), great  
3 advances in both autologous stem cell therapy and disease modeling from patient-  
4 specific iPSCs has been achieved [1]. The “disease-in-a-dish” model [2] enables the  
5 identification of unknown disease mechanisms and drug screening once the disease  
6 phenotype indicator has been determined [3]. However, the phenotypes arising from  
7 the disparate genetic backgrounds of the control and disease iPSCs are often more  
8 robust than those of the disease itself, which hinders translationally relevant comparison  
9 [4]. The establishment of isogenic pairs from disease to control human pluripotent stem  
10 cells (hPSCs) or vice versa using precise gene editing technology was proposed as a  
11 way to minimize this bias [4, 5].

12           Considering that the majority (58%) of genetic diseases result from point  
13 mutations [6], precise gene editing technologies such as base substitution based on  
14 homology-directed repair with Cas9 (hereafter referred to as HDR) [7, 8] and base  
15 editing (BE) [9] have been applied in human iPSCs to correct genetic mutations in  
16 patient iPSCs. However, it is generally accepted that the gene editing efficiency of Cas9  
17 *via* HDR in hPSCs is extremely low compared to other cell lines [10], which remains a  
18 technical challenge for hPSC-based disease modeling. Thus, various approaches have  
19 been developed to improve editing efficiency [11, 12]. One recent study demonstrated  
20 that p53-dependent cell death, induced by a DNA double-strand break (DSB) that  
21 results from the endonuclease activity of Cas9, is responsible for its low gene editing  
22 efficiency in hPSCs [13].

23           While HDR operates in tandem with DSB, base substitution by base editors  
24 (BEs) is achieved through deamination of the target base by deaminase conjugated with  
25 nickase Cas9 (nCas9), without inducing DSB [6, 14, 15]. Target sequence accessibility

1 (hereafter referred to as “target-ability”) of BEs is determined by the protospacer  
2 adjacent motif (PAM) sequence that contains the canonical trinucleotide NGG (NGG-  
3 PAM). As the target-ability of BEs is restricted by the PAM sequence, BEs based on  
4 the NG-PAM sequence were recently developed to overcome this limitation [16, 17].

5 GNE myopathy (OMIM #605820), a rare autosomal recessive degenerative  
6 skeletal muscle disorder, is caused by bi-allelic loss of function (LOF) mutations of the  
7 *GNE* gene. The enzymatic activity of the GNE protein depends in turn upon N-  
8 acetylmannosamine (ManNAc) kinase activity and the epimerase activity of UDP-N-  
9 acetylglucosamine, which is rate-limiting in sialic acid biosynthesis. The reduced  
10 overall epimerase activity of the GNE protein leads to hyposialylation, which is thought  
11 to cause the progressive muscle weakness characteristic of GNE myopathy[18]. There  
12 are no FDA-approved therapies for GNE myopathy [19]. The only drug candidate in  
13 clinical trials is N-acetylmannosamine (ManNAc), the intermediate product in the  
14 synthesis of sialic acid [20]. Due to the unavailability of human GNE disease muscle  
15 cells, immortalized cell lines [21] or mouse models [22] were alternatively used to study  
16 the mechanism. However, these models are insufficient to mimic pathophysiology in  
17 human muscle cells [23]. Thus, an appropriate “GNE myopathy in a dish” model is  
18 required to characterize human GNE pathophysiology.

19 To establish the isogenic disease model, we operationally defined the GNE  
20 disease model as attenuated sialic acid production in GNE mutants, to serve as a  
21 pathophenotype indicator. First, we demonstrated that BEs [6, 14] were more efficient  
22 than HDR in hPSCs due to lesser induction of p53-dependent cell death. Using this  
23 method, we produced 14 hPSCs with point mutations on the *GNE* gene. Isogenic pairs  
24 of hESCs with four different mutations and myocytes derived from these mutant hESCs  
25 revealed mutation-specific hyposialylation. Additionally, the 3D structure modeling of

1 each GNE mutant was consistent with altered GNE enzymatic activity, correlating with  
2 different degrees of hyposialylation. The differing responses of each mutant upon drug  
3 candidate treatment suggests that the mutation status of GNE patients is an important  
4 factor to consider in clinical trials of GNE myopathy drug candidates.

5

6

## 1 **Results**

### 2 **Target-ability of point mutations causing GNE myopathy by base editors**

3 BEs, such as the adenine base editor (ABE) and cytosine base editor (CBE),  
4 substitute the target base through the action of the deaminases TadA or APOBEC1,  
5 respectively, conjugated with nCas9, which induces single-strand breaks (SSB) (Fig.  
6 1A). Both BEs and HDR are potential strategies for the production of isogenic pairs of  
7 disease models with hPSCs. Thus, prior to producing hPSCs for GNE myopathy  
8 modeling, we first investigated the “target-ability” of mutations causing GNE  
9 myopathy from the ClinVar database (<https://www.ncbi.nlm.nih.gov/clinvar/>) [24].  
10 Among the total 63 mutations found in GNE patients that are categorized as  
11 “pathogenic” or “likely pathogenic,” 34 mutations (54%) occur by a transition point  
12 mutation (purine to purine or pyrimidine to pyrimidine) and are targetable with ABE or  
13 CBE (Fig. 1B and Table S1). Eight mutations (12.7%) are transversion mutations  
14 (purine to pyrimidine or vice versa), which are targetable with either the prime editor  
15 (PE) or HDR. Among transition point mutations, for establishing isogenic pairs for a  
16 GNE model (from mutant to wild-type or vice versa), 73.5% of wild-type (25 out of 34  
17 mutations) and 70.6% of mutants (24 out of 34 mutations) are targetable by BEs (Figs.  
18 1C and D). As mentioned above, 25.6% of wild-type (nine mutations) and 29.4% of  
19 mutants (10 mutations) cannot be edited due to the lack of a PAM sequence. The target-  
20 ability of BEs has greatly expanded due to advances in BE techniques using NG-PAM  
21 [16, 17] (e.g., NG-ABE or NG-CBE) (Figs. 1C and D). Interestingly, the relatively  
22 frequent spontaneous deamination of cytosine to uracil in nature may account for the  
23 differential utility of CBE (for C to T mutation) and ABE (for T to C mutation) for  
24 producing mutants and wild-type lines, respectively (Figs. 1C and D).

### 25 **Efficiency of base editing compared to HDR in hESCs**

1           Considering that GNE myopathy occurs by loss of function (LOF) mutations of  
2 either the epimerase or kinase domains [25], it is necessary to examine the functional  
3 effect of mutation in these domains of the GNE protein. For this, we chose four  
4 mutations of the epimerase (R160Q and I329T) and kinase (I588T and V272M)  
5 domains that would be readily achievable by ABE, CBE, and HDR (Fig. 2A).  
6 Compared to BEs, the HDR technique is more broadly targetable to all point mutations  
7 regardless of whether they are transversion or transition mutations [6]. Thus, we first  
8 compared the editing efficiencies of all currently available techniques, HDR [26], ABE  
9 (ABEmax), NG-ABE (NG-ABEmax), CBE (BE4max) and NG-CBE (NG-BE4max)  
10 [17, 27] to generate point mutations of target sequences in hESCs. The efficiency of  
11 base substitution for R160Q by CBE was close to 37% (Fig. 2B), while those of NG-  
12 CBE and HDR were 4.1% and 0.93%, respectively (Figs. 2B and S1A). Similarly, 32.5%  
13 base substitution was achieved by ABE for I588T, while NG-ABE yielded 11.2% (Fig.  
14 S1B) and HDR yielded only 1% (Fig. 2C) substitution. For the V727M mutation, on-  
15 target base substitution efficiencies were 55.8% and 10.1% with CBE and NG-CBE  
16 (Fig. 2D and S1C), respectively, while HDR achieved 3.0% editing efficiency (Fig. 2D).  
17 Base substitution for I329T with HDR, ABE, and NG-ABE showed similar results,  
18 wherein the efficiency of HDR was much lower (4.5% for I329T) than that of ABE  
19 (8.6%) and NG-ABE (6.3%) (Figs. 2E and S1D). However, the existence of bystander  
20 sequences in the target window reduced the observed percentage of base substitution  
21 without bystander mutation in V727M (Fig. S1E). Although two mutants with  
22 bystander mutation occurred in the I329T target, one was a silent mutation (I329I) and  
23 the other was due to codon degeneracy (Fig. S1F). The GNE mutant hESCs with  
24 bystander mutations are listed in Table S2.

1 As low HDR efficiency compared to indel by Cas9 for GNE mutations (Fig.  
2 S1G) demands laborious clonal selection in hPSCs [28], the inefficiency of HDR  
3 remains a serious technical limitation to be resolved for disease modeling in hPSCs  
4 despite the advantage of broader target-ability. Furthermore, we observed that NGG-  
5 BEs (ABE and CBE) were more efficient than NG-BEs (NG-ABE and NG-CBE) as  
6 previously reported [29].

7

### 8 **P53 response by Cas9 determines editing efficiency**

9 The extremely low gene editing efficiency with Cas9 in hPSCs [10, 11] results  
10 from p53-dependent cell death upon DSB caused by the endonuclease activity of Cas9  
11 [13]. hPSCs are particularly susceptible to p53-dependent cell death once DSB occurs,  
12 which is thought to be a protective mechanism to rigorously maintain genome integrity  
13 during development [30]. Thus, we hypothesized that the low editing efficiency of HDR  
14 compared to BEs (Figs. 2B - E) may result from different p53 responses. To explore  
15 this hypothesis, we first established *TP53* KO hESCs by targeting exon 3 of *TP53* (Fig.  
16 S2A). After introducing sgRNA and Cas9 in hESCs, nutlin3, which is an inhibitor of  
17 MDM2, was applied to stabilize p53, causing massive cell death, as expected (Fig. S2B).  
18 After nutlin3 treatment, the few clones that survived were *TP53* KO hESCs (Fig. S2C).  
19 The p53-dependent response of Cas9 or BEs was assessed by the measuring the level  
20 of *PPM1D*, a typical target gene of p53 [31]. When introducing Cas9 with sgRNA into  
21 hESCs as previously described [13], BEs only marginally affected the p53 response  
22 (Fig. 2F). Consistent with the p53 response, significantly more hESCs remained and  
23 survived when BEs were used, compared to the Cas9 approach, while all *TP53* KO  
24 hESCs tolerated the stress of gene editing (Fig. 2G). The effects of gene editing  
25 techniques in WT and *TP53* KO hESCs were monitored in real-time (Movies S1 and



1 S2). Due to the higher rate of survival during the gene editing process in *TP53* KO  
2 hESCs than in wild-type hESCs, the gene editing efficiency of KO with both Cas9 and  
3 BEs was improved in *TP53* KO hESCs (Fig. 2H).

4

## 5 **Establishment of GNE myopathy disease models through base editors**

6 While BEs are limited relative to HDR by their requirement for PAM and their  
7 target-ability only to transition mutations, they yield higher gene editing efficiency than  
8 HDR and are currently the most feasible approach for base substitution in hPSCs.  
9 Accordingly, we successfully established 14 GNE mutants in total in both hESCs and  
10 hiPSCs using BEs (Tables S2). Briefly, based on H9 hESCs, two LOF mutants in the  
11 epimerase domain of GNE generated with CBE (R160Q) and ABE (I329T) (Figs. 3A  
12 and B) and two LOF mutants in the kinase domain using NG-ABE (I588T) and CBE  
13 (V727M) were established (Figs. 3C and D). Other GNE mutant cell lines (I329T,  
14 R160Q, and I588T) were established in CHA3-hESCs (Fig. S3D) and BJ-iPSCs (Figs.  
15 S3E and F) using NG-ABE, ABE, or CBE, as listed in Table S2. Of note, since the  
16 target windows of I329T and V727M carry bystander bases, five mutants with  
17 bystander mutations including I329I, a silent mutation, were also established in V727M  
18 (Figs. S3B and C) and I329T (Fig. S3D).

19

## 20 **Mutation-specific phenotype of GNE myopathy disease models**

21 The four established GNE mutant hESCs displayed typical cellular morphology  
22 and comparable OCT4 expression (Fig. 4A). As the putative underlying cause of GNE  
23 myopathy is hyposialylation, we first assessed levels of sialic acid production using a  
24 sialic acid-specific *Sambucus nigra agglutinin* (SNA) lectin binding assay in four  
25 different GNE-hESCs. As shown in Figure 4B, the levels of lectin staining were

1 significantly diminished in all mutant hESCs to different degrees, relative to controls.  
2 The mean fluorescence intensity (MFI) of SNA lectin clearly indicated that the  
3 sialylation of the protein varied depending on the mutation (Figs. 4C and D). Of note,  
4 binding of SNA lectin indicates that the level of sialylation of protein, the final step for  
5 sialic acid biosynthesis, is a reliable indicator of GNE enzymatic activity. The  
6 pathogenic severity of GNE myopathy in a patient harboring the I329T mutation [25],  
7 could therefore be predicted by the extent of sialylation reduction, which was greatest  
8 in the I329T mutant (Fig. 4D). In this cell line, the level of sialic acid produced in GNE  
9 mutants relative to WT (Fig. 4D) can be used to determine pathogenicity. Thus, we  
10 compared pathological severity previously predicted by *in silico* platforms (PolyPhen2,  
11 SIFT, Align, and Pmut) [25] to the MFI of each GNE mutant. The V727M mutant,  
12 which was predicted to be largely “pathogenic,” showed moderate hyposialylation (Fig.  
13 4C). As the V727M mutation occurs in the compound heterozygous state, even with  
14 the prevalent distribution of this variant (rs121908627), this mutation itself would have  
15 a less serious effect on GNE myopathy. We would thus expect the I588T mutant, which  
16 is a variant of uncertain significance (VUS), to be “Pathogenic/Likely pathogenic”  
17 since hyposialylation levels in this mutant are comparable to those observed in the  
18 R160Q mutant, which is classified as “Pathogenic/Likely pathogenic” (Fig. 4D).

19 The hyposialylation of other GNE models derived from BJ-iPSC and hCHA3  
20 hESCs were examined. Evident hyposialylation (Fig. S4A) and recovery by sialic acid  
21 treatment (Fig. S4B), compared to that of the silent I329I mutation established in  
22 hCHA3 cells, ruled out the possibility of baseline effects of gene editing itself on  
23 hyposialylation. The comparable hyposialylation of R160Q and I588T was also  
24 reproduced in GNE mutants derived from BJ-iPSCs (Figs. S4C and D). Importantly,  
25 the levels of sialic acid differed in a cell type-specific manner depending on genetic

1 background (Fig. 4E). This supports the necessity of an isogenic pair for precise  
2 comparison as highlighted previously [4].

3 Prior to inducing the differentiation of GNE-hESCs into myocytes, we  
4 examined whether hyposialylation would affect “pluripotency.” To examine this effect,  
5 I329T hESCs were used, as they showed the most severe hyposialylation. Neither  
6 alkaline phosphatase activity, which is a well-characterized pluripotency indicator, nor  
7 the mRNA expression of typical pluripotency markers were altered (Figs. S5A and B).  
8 Additionally, teratomas from the I329T mutant developed normally (Fig. S5C). Thus,  
9 we concluded that hyposialylation due to GNE mutation had minimal effects on the  
10 pluripotency of hESCs.

11

## 12 **Structural analysis predicts mutation-specific hyposialylation**

13 The varying degrees of hyposialylation among the GNE mutants inspired us to  
14 analyze each mutation at the molecular level. We used the GNE structure to predict the  
15 molecular consequences of each mutation on the enzymatic activity of GNE. The  
16 epimerization reaction of GNE requires tetramerization through the N-terminal domain,  
17 which is stabilized upon ligand binding (Fig. 5A) [32, 33]. R160 stabilizes the C-  
18 terminal loop via interaction with the main chains of D409, Q411, and E412 (Fig. 5B).  
19 This loop interacts with the residues involved in the N-terminal dimerization interface.  
20 The R160Q mutant contains a shorter side chain that would require loop reorganization  
21 were they to interact, which could possibly affect epimerase oligomerization (Fig. 5B).  
22 However, the hyposialylation effect of R160Q was less adverse than that of the I329T  
23 mutation. I329 participates in forming an extensive network of hydrophobic  
24 interactions (Fig 5C). Importantly, L249, located adjacent to I329, interacts directly  
25 with uridine diphosphate (UDP) (Fig. 5C). The I329T mutation, which introduces a

1 smaller and less hydrophobic residue, would weaken the Van der Waals interactions  
2 within the hydrophobic core, affecting the structural integrity near the substrate-binding  
3 site. Meanwhile, the kinase domain of GNE displays a typical bi-lobal architecture and  
4 contains a type I zinc-binding motif characteristic of the repressor, open reading frame,  
5 kinase (ROK) family (Fig. 5A) [34, 35]. Full-length GNE requires dimerization to  
6 permit ManNAc kinase activity [35]. I588 is located at the dimerization interface of the  
7 kinase C-terminal lobe (Fig. 5D); mutating this residue to less-hydrophobic threonine  
8 (Thr) affects kinase dimerization and thus its activity. Finally, V727 is buried in a  
9 hydrophobic core [34]. The modeling of the V727M mutation suggests that the bulkier  
10 methionine (Met) may induce structural changes at this site to avoid steric clash (Fig.  
11 5E). However, since this residue is positioned away from the catalytic site, the V727M  
12 mutation is expected to cause a less severe phenotype than the I329T mutation.

13 Structural analysis of GNE mutants shows that the I329T mutation, which can  
14 cause structural instability, is located near the active site. As a result, this mutation is  
15 expected to have the most adverse effect on GNE epimerase activity. Indeed, the I329T  
16 mutant shows the most pronounced hyposialylation (Figs. 4C and D).

### 17 **Mutation-specific drug response of GNE myopathy disease models**

18 To compensate for the hyposialylation caused by reduced GNE enzymatic  
19 activity in GNE myopathy patients, administration of ManNAc is being investigated in  
20 clinical trials for GNE patients (NCT02346461) following a safety profile study [20],  
21 despite the unsatisfactory outcome of a sialic acid clinical trial [36]. We therefore  
22 hypothesized that ManNAc would elicit a distinctive response in GNE patients with a  
23 mutation in the domain of ManNAc kinase because ManNAc is a direct substrate of  
24 this enzyme (Fig. 6A). To explore this possibility, we examined the recovery of  
25 hyposialylation of GNE mutants in the epimerase domain (R160Q and I329T) and

1 kinase domain (I588T and V727M) after treatment with ManNAc. As predicted, the  
2 recovery of sialic acid production after ManNAc treatment occurred in GNE mutants  
3 harboring mutations in the epimerase domains (R160Q and I329T), while the effect in  
4 the kinase mutant (I588T) was marginal (Figs. 6B and C). The dose-dependent response  
5 curve clearly revealed the mutant-specific ManNAc response (Figs. 6D and E). We  
6 noticed that sialic acid production was reduced in V727M, for unknown reasons (Fig.  
7 6E). These data suggest that the ManNAc response differs according to the mutation  
8 type of GNE.

9

#### 10 **GNE myopathy modeling in myocytes derived from GNE-hESCs**

11 Next, to verify mutation-specific responses in myocytes, WT and GNE-hESCs  
12 were differentiated into skeletal myocytes (hereafter referred to as myocytes) through  
13 multiple steps (Fig. 7A). The expression levels of typical markers for myocytes (e.g.,  
14 *MyoG*, *MYH2*, and *MYH7*) and pluripotency (e.g., *NANOG* or *SOX2*) were used to  
15 evaluate myocyte differentiation (Fig. 7B). Differentiated myocytes possessed typical  
16 elongated, rod-shaped morphology and expressed myosin heavy chain (MHC) (Fig.  
17 7C). Myocytes differentiated from GNE-hESCs also showed typical cellular  
18 morphology, similar to that of WT (Fig. 7D). Unfortunately, we did not observe unusual  
19 structural alterations such as rimmed vacuoles, a typical clinicopathologic feature of  
20 GNE myopathy, in GNE myocytes (Fig. 7D). This may have resulted from the technical  
21 limitations associated with fully mature myocyte differentiation from hPSCs [37].  
22 Notably, the mutation-specific hyposialylation observed in GNE-hESCs (Fig. 4D) was  
23 also more pronounced in GNE-myocytes relative to controls (Fig. 7E). Consistent with  
24 results in GNE-hESCs, ManNAc treatment restored sialylation in I329T GNE  
25 myocytes harboring epimerase mutations but not V727M GNE myocytes with kinase

1 mutations (Fig. 7F). While understanding of the functionality of skeletal myocytes  
2 derived from hPSCs is limited, the functionality of cardiomyocytes differentiated from  
3 hESCs (hESC-CMs) has been well-characterized [38]. Thus, we examined whether  
4 GNE mutation affects the functionality of cardiomyocytes, as cardiomyopathy has  
5 sometimes been reported in GNE patients [39]. hESC-CMs with higher Troponin T2,  
6 Cardiac type (*TNNT2*) and lower *NANOG* expression than hESCs (Fig. S6A) showed  
7 clear beating behavior (Movie S3). GNE mRNA expression was comparable regardless  
8 of mutation status (Fig. 6B). Consistent mutation-specific hyposialylation and drug  
9 responses were also observed in hESCs-CMs with different GNE mutations (Figs. S6C  
10 and S6D). The hyposialylation of hESC-CMs with the I329T mutation (Fig. S3D) was  
11 evident when compared with hESCs-CM with the I329I silent mutation (Fig. S6E). The  
12 comparison of beating behavior of hESC-CM from WT or I329T hESCs revealed no  
13 significant changes resulting from GNE mutation (Movies S4A and B).

14

## 1 **Discussion**

### 2 ***Base editors for disease modeling in hPSCs***

3           Despite the high editing efficiency of BEs compared to HDR in hPSCs, the  
4 limited target accessibility of BEs relative to HDR would be disadvantageous in disease  
5 modeling using hPSCs. Through the development and implementation of NG-BEs for  
6 gene editing, coverage of BEs for GNE myopathy modeling encompassed 73.5% of  
7 transition point mutations in the present study (Fig. 1). We demonstrated that BEs were  
8 more efficient than HDR due to their lesser effect on p53 (Fig. S2). Along with PAM-  
9 less target sequences, which account for 26.5% of transition mutations in GNE  
10 myopathy, the production of undesirable mutations of bystander bases by BEs would  
11 be a significant drawback in hPSC-based disease modeling. Thus, the development of  
12 “PAM-less BEs” and “BEs with narrowed editing windows” would be advantageous  
13 for more efficient disease modeling with BE techniques, along with improved HDR.

### 14 ***Significance of isogenic disease model***

15           Here, we established 14 GNE mutants from three hPSCs with different genetic  
16 backgrounds. Hyposialylation, a typical pathological phenotype of GNE myocytes,  
17 occurred in a mutation-specific manner regardless of hPSC cell type. However, because  
18 the basal level of sialic acid in the wild-type of the three hPSCs (H9, hCHA3: hESCs,  
19 BJ-iPSCs and SES8 [40]: iPSCs) differed relative to the mutant hPSCs, comparison of  
20 sialic acid between unmatched pairs could not allow us to precisely determine the  
21 effect of mutation (Fig. 4F). Previously, various disease models were established using  
22 iPSCs derived from patients, in which disease phenotype was compared with non-  
23 identical control iPSCs [41, 42]. This study confirmed the previously proposed [4]  
24 potential for bias introduced by the use of cells with an unmatched genetic background  
25 to hinder precise comparisons of pathological phenotypes. In addition, GNE is critical

1 for the early development of both skeletal and cardiac muscle, as demonstrated in GNE  
2 KO mouse ESCs [43]. Therefore, homozygous nonsense or frame-shifting mutations  
3 are not reported in GNE patients [44]. Following this reasoning, instead of the knockout  
4 model of GNE, GNE-hESCs with clinically diagnosed mutations could serve as a  
5 clinically relevant disease model.

### 6 ***Base editing technique for validating a variant of uncertain significance***

7 Since large numbers of single nucleotide variants (SNVs) observed in GNE as  
8 well as other rare genetic diseases cause missense mutations, the functional  
9 consequences of mutations are often unpredictable, particularly in rare diseases with  
10 insufficient *a priori* observations and incomplete penetrance [45]. With isogenic  
11 disease models, one can classify these so-called “variants of uncertain significance”  
12 (VUS) [45] more accurately with the aid of functional information. In the present study,  
13 for example, since I588T showed a similar level of hyposialylation as R160Q, classified  
14 as “Pathogenic/Likely pathogenic,” we inferred that I588T may also be pathogenic. The  
15 I588T variant was originally annotated as “uncertain significance” in the ClinVar  
16 database [24]. The efficient induction of point mutation with BEs (or PE in the near  
17 future) would enhance further studies seeking to validate the effect of VUS.

### 18 ***Consideration of mutation-specific drug response***

19 We also demonstrated that epimerase mutants (R160Q and I329T) but not  
20 kinase mutants (I588T and V727M) showed recovery of sialylation after ManNAc  
21 treatment (Figs. 6D and 7G). Interestingly, while the I588T mutant showed no recovery,  
22 the V727M mutation resulted in reduced sialylation following ManNAc treatment, for  
23 unknown reasons. In light of these mutant-specific responses to ManNAc, it would be  
24 advisable to use patient stratification based on mutation status in clinical trials of  
25 ManNAc, to ensure accurate efficacy validation with ManNAc and similar drugs.



## 1 ***Future prospects for drug development based on isogenic disease models***

2           A recent study developed a high throughput (HT) phenotypic screening system  
3 to measure CFTR protein in cystic fibrosis with an isogenic pair of iPSCs [46].  
4 Similarly, HT phenotypic screening with isogenic GNE myopathy disease models using  
5 the level of sialylation as a phenotypic indicator could accelerate drug development for  
6 GNE myopathy. Furthermore, by taking advantage of isogenic disease models and a  
7 drug-transcriptome database such as the Connectivity MAP [47], drug candidates from  
8 the FDA-approved drug library that reverse pathogenic gene signatures can easily be  
9 predicted [48, 49]. The efficacy of these drug candidates can then be validated in the  
10 “GNE myopathy in a dish” model, making this strategy a strong potential option to  
11 develop drugs for GNE myopathy in the future.

## 12 ***Conclusion***

13           NG-BEs covered the majority of pathogenic transversion point mutation and  
14 showed higher precise gene editing efficiency than HDR in hPSCs. The isogenic “GNE  
15 myopathy in a dish model,” established in hPSCs by BEs with relatively high efficiency,  
16 revealed mutation-specific hyposialylation and drug responses. This work establishes  
17 important cellular tools and techniques for further mechanistic studies and development  
18 of drug screening systems.

## 19 ***Author contributions***

20 HJ.C conceived the overall study design and led the experiments. JC.P and J.K mainly  
21 conducted the experiments, data analysis, and critical discussion of the results. HK.J  
22 and S.B contributed to sgRNA design and NGS analysis and provided gene editing  
23 techniques. SY.L, KT.K and S.P. produced mutant lines. HS.L and HJ.C performed 3D  
24 protein structure modeling. SJ.P and SH.M conducted the experiments with  
25 differentiated cardiomyocytes.

1 **Declaration of competing interest**

2 The authors declare that they have no known competing financial interests or personal  
3 relationships that could have appeared to influence the work reported in this paper.

4 **Acknowledgments**

5 This work was supported by a grant from the National Research Foundation of Korea  
6 (2017M3A9B3061843 and 2020R1A2C2005914) and a grant from the Research of  
7 Korea Centers for Disease Control and Prevention (2020-ER6902-00).

8

9

10

## 1 **Materials and Methods**

### 2 **Live cell ratio after gene editing in WT and TP53 KO hESCs**

3 To trace the number of live cells during gene editing, cells were documented by JuLI  
4 stage for 36 hours after transfection. Cells were transfected with the same condition in  
5 ‘Generation of TP53 knock-out and GNE mutant hPSCs’. The number of cells at the  
6 time point of 2 hours and 36 hours were counted by cell counter ImageJ plugin. To  
7 calculate the live cell ratio, the number of cells at the time point of 36 hours were  
8 divided by the number of cells at the time point of 2 hours.

### 9 **Generation of TP53 knock-out and GNE mutant hPSCs**

10 For hPSC transfection, cells were detached with Accutase™ (561527, BD Bioscience)  
11 and washed with DPBS for three times and resuspended to concentration of  $1 \times 10^6$  cell  
12 in 100  $\mu$ l with Opti-MEM (31985070, Gibco). 2  $\mu$ g of Cas9 or BE vectors (Cas9,  
13 BE4max, NG-BE4max, ABEmax and NG-ABEmax cloned in pCMV vector), 3  $\mu$ g of  
14 sgRNA vector and 2  $\mu$ g of ssODN (in case of HDR) was added to 100  $\mu$ l of cell mixture.  
15 Electroporation was performed by NEPA-21 with 175 V of poring pulse and 2.5 mV  
16 of transfer pulse. To enrich TP53 KO cells, 10  $\mu$ M of nutlin3 was treated for 48 hours  
17 after 5 days from transfection.

### 18 **Flow cytometry**

19 Cells were detached with Accutase solution (561527, BD Bio-sciences) for hPSCs or  
20 with TrypLE (12604, Gibco) for myocytes, followed by 3 times DPBS wash and then  
21 analyzed through FACS Calibur I (BD Bioscience). For the determination of sialic acid,  
22 cells were stained with Fluorescein SNA (FL-1301, Vector Laboratories). CellQuest  
23 Pro soft-ware was used for FACS analysis.

### 24 **Generation of skeletal muscle cells from hESC**

1 hESCs were differentiated to skeletal muscle cells by using commercially available  
2 skeletal muscle differentiation medium kit (Amsbio). In brief, Cells were seeded onto  
3 a collagen I (Sigma)-coated dish at 5,000 cells /cm<sup>2</sup> dish and maintained for 6 days in  
4 skeletal muscle induction medium (SKM01, Amsbio). At day 6, cells were dissociated  
5 with 0.05% trypsin, seeded onto a collagen I-coated dish at 5,000 cells /cm<sup>2</sup> dish, and  
6 maintained for 6 days in myoblast cell culture medium (SKM02, Amsbio). At day 12,  
7 when myoblasts are confluent, the medium was changed to myotube cell culture  
8 medium (SKM03, Amsbio) and freshly changed every 3 days for more than 6 days. For  
9 drug response test, cells were treated with ManNAc (Sigma) at the indicated times and  
10 concentrations and the media with ManNAc was changed every day.

#### 11 **Statistical analysis**

12 The quantitative data are expressed as the mean values  $\pm$  standard deviation (SD).  
13 Student's unpaired t-tests was performed to analyze the statistical significance of each  
14 response variable using the PRISM. p values less than 0.05 were considered statistically  
15 significant (\* < 0.05, \*\* <0.001 and \*\*\*<0.0001)

16

## 1 Reference

- 2 [1] (!!! INVALID CITATION !!! [1]).
- 3 [2] G. Tiscornia, E.L. Vivas, J.C. Izpisua Belmonte, Diseases in a dish: modeling  
4 human genetic disorders using induced pluripotent cells, *Nat Med* 17(12) (2011)  
5 1570-6.
- 6 [3] (!!! INVALID CITATION !!! [3]).
- 7 [4] Florian T. Merkle, K. Eggan, Modeling Human Disease with Pluripotent Stem  
8 Cells: from Genome Association to Function, *Cell Stem Cell* 12(6) (2013) 656-668.
- 9 [5] K. Musunuru, Genome editing of human pluripotent stem cells to generate  
10 human cellular disease models, *Disease Models & Mechanisms* 6(4) (2013) 896-  
11 904.
- 12 [6] H.A. Rees, D.R. Liu, Base editing: precision chemistry on the genome and  
13 transcriptome of living cells, *Nat Rev Genet* 19(12) (2018) 770-788.
- 14 [7] J. Jackow, Z. Guo, C. Hansen, H.E. Abaci, Y.S. Doucet, J.U. Shin, R. Hayashi, D.  
15 DeLorenzo, Y. Kabata, S. Shinkuma, J.C. Salas-Alanis, A.M. Christiano,  
16 CRISPR/Cas9-based targeted genome editing for correction of recessive  
17 dystrophic epidermolysis bullosa using iPS cells, *Proc Natl Acad Sci U S A* (2019).
- 18 [8] A. Izmiryan, C. Ganier, M. Bovolenta, A. Schmitt, F. Mavilio, A. Hovnanian, Ex  
19 Vivo COL7A1 Correction for Recessive Dystrophic Epidermolysis Bullosa Using  
20 CRISPR/Cas9 and Homology-Directed Repair, *Mol Ther Nucleic Acids* 12 (2018)  
21 554-567.
- 22 [9] M.J. Osborn, G.A. Newby, A.N. McElroy, F. Knipping, S.C. Nielsen, M.J. Riddle, L.  
23 Xia, W. Chen, C.R. Eide, B.R. Webber, H.H. Wandall, S. Dabelsteen, B.R. Blazar, D.R.  
24 Liu, J. Tolar, Base Editor Correction of COL7A1 in Recessive Dystrophic  
25 Epidermolysis Bullosa Patient-Derived Fibroblasts and iPSCs, *J Invest Dermatol*  
26 140(2) (2020) 338-347 e5.
- 27 [10] P. Mali, L. Yang, K.M. Esvelt, J. Aach, M. Guell, J.E. DiCarlo, J.E. Norville, G.M.  
28 Church, RNA-guided human genome engineering via Cas9, *Science* 339(6121)  
29 (2013) 823-6.
- 30 [11] K.T. Kim, J.C. Park, H.K. Jang, H. Lee, S. Park, J. Kim, O.S. Kwon, Y.H. Go, Y. Jin,  
31 W. Kim, J. Lee, S. Bae, H.J. Cha, Safe scarless cassette-free selection of genome-  
32 edited human pluripotent stem cells using temporary drug resistance,  
33 *Biomaterials* 262 (2020) 120295.
- 34 [12] T.L. Maurissen, K. Woltjen, Synergistic gene editing in human iPS cells via cell  
35 cycle and DNA repair modulation, *Nat Commun* 11(1) (2020) 2876.
- 36 [13] R.J. Ihry, K.A. Worringer, M.R. Salick, E. Frias, D. Ho, K. Theriault, S. Kommineni,  
37 J. Chen, M. Sondey, C. Ye, R. Randhawa, T. Kulkarni, Z. Yang, G. McAllister, C. Russ,  
38 J. Reece-Hoyes, W. Forrester, G.R. Hoffman, R. Dolmetsch, A. Kaykas, p53 inhibits  
39 CRISPR-Cas9 engineering in human pluripotent stem cells, *Nat Med* 24(7) (2018)  
40 939-946.
- 41 [14] A.C. Komor, Y.B. Kim, M.S. Packer, J.A. Zuris, D.R. Liu, Programmable editing  
42 of a target base in genomic DNA without double-stranded DNA cleavage, *Nature*  
43 533(7603) (2016) 420-4.
- 44 [15] N.M. Gaudelli, A.C. Komor, H.A. Rees, M.S. Packer, A.H. Badran, D.I. Bryson, D.R.  
45 Liu, Programmable base editing of A\*T to G\*C in genomic DNA without DNA  
46 cleavage, *Nature* 551(7681) (2017) 464-471.
- 47 [16] H. Nishimasu, X. Shi, S. Ishiguro, L. Gao, S. Hirano, S. Okazaki, T. Noda, O.O.  
48 Abudayyeh, J.S. Gootenberg, H. Mori, S. Oura, B. Holmes, M. Tanaka, M. Seki, H.

- 1 Hirano, H. Aburatani, R. Ishitani, M. Ikawa, N. Yachie, F. Zhang, O. Nureki,  
2 Engineered CRISPR-Cas9 nuclease with expanded targeting space, *Science*  
3 361(6408) (2018) 1259-1262.
- 4 [17] T.P. Huang, K.T. Zhao, S.M. Miller, N.M. Gaudelli, B.L. Oakes, C. Fellmann, D.F.  
5 Savage, D.R. Liu, Circularly permuted and PAM-modified Cas9 variants broaden  
6 the targeting scope of base editors, *Nat Biotechnol* 37(6) (2019) 626-631.
- 7 [18] S. Noguchi, Y. Keira, K. Murayama, M. Ogawa, M. Fujita, G. Kawahara, Y. Oya,  
8 M. Imazawa, Y. Goto, Y.K. Hayashi, I. Nonaka, I. Nishino, Reduction of UDP-N-  
9 acetylglucosamine 2-epimerase/N-acetylmannosamine kinase activity and  
10 sialylation in distal myopathy with rimmed vacuoles, *J Biol Chem* 279(12) (2004)  
11 11402-7.
- 12 [19] I. Nishino, N. Carrillo-Carrasco, Z. Argov, GNE myopathy: current update and  
13 future therapy, *J Neurol Neurosurg Psychiatry* 86(4) (2015) 385-92.
- 14 [20] X. Xu, A.Q. Wang, L.L. Latham, F. Celeste, C. Ciccone, M.C. Malicdan, B. Goldspiel,  
15 P. Terse, J. Craddock, N. Yang, S. Yorke, J.C. McKew, W.A. Gahl, M. Huizing, N. Carrillo,  
16 Safety, pharmacokinetics and sialic acid production after oral administration of N-  
17 acetylmannosamine (ManNAc) to subjects with GNE myopathy, *Mol Genet Metab*  
18 122(1-2) (2017) 126-134.
- 19 [21] N.D. Pham, P.C. Pang, S. Krishnamurthy, A.M. Wands, P. Grassi, A. Dell, S.M.  
20 Haslam, J.J. Kohler, Effects of altered sialic acid biosynthesis on N-linked glycan  
21 branching and cell surface interactions, *J Biol Chem* 292(23) (2017) 9637-9651.
- 22 [22] Y.M. Chan, P. Lee, S. Jungles, G. Morris, J. Cadaoas, A. Skrinar, M. Vellard, E.  
23 Kakkis, Substantial deficiency of free sialic acid in muscles of patients with GNE  
24 myopathy and in a mouse model, *PLoS One* 12(3) (2017) e0173261.
- 25 [23] R.L. Perlman, Mouse models of human disease: An evolutionary perspective,  
26 *Evol Med Public Health* 2016(1) (2016) 170-6.
- 27 [24] M.J. Landrum, J.M. Lee, M. Benson, G. Brown, C. Chao, S. Chitipiralla, B. Gu, J.  
28 Hart, D. Hoffman, J. Hoover, W. Jang, K. Katz, M. Ovetsky, G. Riley, A. Sethi, R. Tully,  
29 R. Villamarin-Salomon, W. Rubinstein, D.R. Maglott, ClinVar: public archive of  
30 interpretations of clinically relevant variants, *Nucleic Acids Res* 44(D1) (2016)  
31 D862-8.
- 32 [25] F.V. Celeste, T. Vilboux, C. Ciccone, J.K. de Dios, M.C. Malicdan, P. Leoyklang,  
33 J.C. McKew, W.A. Gahl, N. Carrillo-Carrasco, M. Huizing, Mutation update for GNE  
34 gene variants associated with GNE myopathy, *Hum Mutat* 35(8) (2014) 915-26.
- 35 [26] L. Yang, M. Guell, S. Byrne, J.L. Yang, A. De Los Angeles, P. Mali, J. Aach, C. Kim-  
36 Kiselak, A.W. Briggs, X. Rios, P.Y. Huang, G. Daley, G. Church, Optimization of  
37 scarless human stem cell genome editing, *Nucleic Acids Res* 41(19) (2013) 9049-  
38 61.
- 39 [27] L.W. Koblan, J.L. Doman, C. Wilson, J.M. Levy, T. Tay, G.A. Newby, J.P. Maianti,  
40 A. Raguram, D.R. Liu, Improving cytidine and adenine base editors by expression  
41 optimization and ancestral reconstruction, *Nat Biotechnol* 36(9) (2018) 843-846.
- 42 [28] H.L. Li, P. Gee, K. Ishida, A. Hotta, Efficient genomic correction methods in  
43 human iPS cells using CRISPR-Cas9 system, *Methods* 101 (2016) 27-35.
- 44 [29] Y.K. Jeong, J. Yu, S. Bae, Construction of non-canonical PAM-targeting  
45 adenosine base editors by restriction enzyme-free DNA cloning using CRISPR-  
46 Cas9, *Sci Rep* 9(1) (2019) 4939.
- 47 [30] U. Weissbein, N. Benvenisty, U. Ben-David, Quality control: Genome  
48 maintenance in pluripotent stem cells, *J Cell Biol* 204(2) (2014) 153-63.

- 1 [31] M. Fiscella, H. Zhang, S. Fan, K. Sakaguchi, S. Shen, W.E. Mercer, G.F. Vande  
2 Woude, P.M. O'Connor, E. Appella, Wip1, a novel human protein phosphatase that  
3 is induced in response to ionizing radiation in a p53-dependent manner, *Proc Natl*  
4 *Acad Sci U S A* 94(12) (1997) 6048-53.
- 5 [32] D. Ghaderi, H.M. Strauss, S. Reinke, S. Cirak, W. Reutter, L. Lucka, S. Hinderlich,  
6 Evidence for dynamic interplay of different oligomeric states of UDP-N-  
7 acetylglucosamine 2-epimerase/N-acetylmannosamine kinase by biophysical  
8 methods, *J Mol Biol* 369(3) (2007) 746-58.
- 9 [33] S.C. Chen, C.H. Huang, S.J. Lai, C.S. Yang, T.H. Hsiao, C.H. Lin, P.K. Fu, T.P. Ko, Y.  
10 Chen, Mechanism and inhibition of human UDP-GlcNAc 2-epimerase, the key  
11 enzyme in sialic acid biosynthesis, *Sci Rep* 6 (2016) 23274.
- 12 [34] Y. Tong, W. Tempel, L. Nedyalkova, F. Mackenzie, H.W. Park, Crystal structure  
13 of the N-acetylmannosamine kinase domain of GNE, *PLoS One* 4(10) (2009) e7165.
- 14 [35] J. Martinez, L.D. Nguyen, S. Hinderlich, R. Zimmer, E. Tauberger, W. Reutter,  
15 W. Saenger, H. Fan, S. Moniot, Crystal structures of N-acetylmannosamine kinase  
16 provide insights into enzyme activity and inhibition, *J Biol Chem* 287(17) (2012)  
17 13656-65.
- 18 [36] H. Lochmuller, A. Behin, Y. Caraco, H. Lau, M. Mirabella, I. Tournev, M.  
19 Tarnopolsky, O. Pogoryelova, C. Woods, A. Lai, J. Shah, T. Koutsoukos, A. Skrinar,  
20 H. Mansbach, E. Kakkis, T. Mozaffar, A phase 3 randomized study evaluating sialic  
21 acid extended-release for GNE myopathy, *Neurology* 92(18) (2019) e2109-e2117.
- 22 [37] N. Jiwlawat, E. Lynch, J. Jeffrey, J.M. Van Dyke, M. Suzuki, Current Progress and  
23 Challenges for Skeletal Muscle Differentiation from Human Pluripotent Stem Cells  
24 Using Transgene-Free Approaches, *Stem Cells Int* 2018 (2018) 6241681.
- 25 [38] C.L. Mummery, J. Zhang, E.S. Ng, D.A. Elliott, A.G. Elefanty, T.J. Kamp,  
26 Differentiation of human embryonic stem cells and induced pluripotent stem cells  
27 to cardiomyocytes: a methods overview, *Circ Res* 111(3) (2012) 344-58.
- 28 [39] M.C. Malicdan, L. Mian, P. Leoyklang, F. Celeste, D. Despres, P. Zerfas, N.  
29 Carrillo-Carrasco, W.A. Gahl, GP 52, *Neuromuscular Disorders* 9(24) (2014)  
30 810 %@ 0960-8966.
- 31 [40] T.H. Lee, S.H. Song, K.L. Kim, J.Y. Yi, G.H. Shin, J.Y. Kim, J. Kim, Y.M. Han, S.H.  
32 Lee, S.H. Lee, S.H. Shim, W. Suh, Functional recapitulation of smooth muscle cells  
33 via induced pluripotent stem cells from human aortic smooth muscle cells, *Circ*  
34 *Res* 106(1) (2010) 120-8.
- 35 [41] A. Yamashita, M. Morioka, H. Kishi, T. Kimura, Y. Yahara, M. Okada, K. Fujita,  
36 H. Sawai, S. Ikegawa, N. Tsumaki, Statin treatment rescues FGFR3 skeletal  
37 dysplasia phenotypes, *Nature* 513(7519) (2014) 507-11.
- 38 [42] G. Lee, E.P. Papapetrou, H. Kim, S.M. Chambers, M.J. Tomishima, C.A. Fasano,  
39 Y.M. Ganat, J. Menon, F. Shimizu, A. Viale, V. Tabar, M. Sadelain, L. Studer, Modelling  
40 pathogenesis and treatment of familial dysautonomia using patient-specific iPSCs,  
41 *Nature* 461(7262) (2009) 402-6.
- 42 [43] I. Milman Krentsis, I. Sela, R. Eiges, V. Blanchard, M. Berger, M. Becker Cohen,  
43 S. Mitrani-Rosenbaum, GNE is involved in the early development of skeletal and  
44 cardiac muscle, *PLoS One* 6(6) (2011) e21389.
- 45 [44] O. Pogoryelova, J.A. Gonzalez Coraspe, N. Nikolenko, H. Lochmuller, A. Roos,  
46 GNE myopathy: from clinics and genetics to pathology and research strategies,  
47 *Orphanet J Rare Dis* 13(1) (2018) 70.



- 1 [45] G.M. Findlay, R.M. Daza, B. Martin, M.D. Zhang, A.P. Leith, M. Gasperini, J.D.  
2 Janizek, X. Huang, L.M. Starita, J. Shendure, Accurate classification of BRCA1  
3 variants with saturation genome editing, *Nature* 562(7726) (2018) 217-222.  
4 [46] S. Merkert, M. Schubert, R. Olmer, L. Engels, S. Radetzki, M. Veltman, B.J.  
5 Scholte, J. Zollner, N. Pedemonte, L.J.V. Galiotta, J.P. von Kries, U. Martin, High-  
6 Throughput Screening for Modulators of CFTR Activity Based on Genetically  
7 Engineered Cystic Fibrosis Disease-Specific iPSCs, *Stem Cell Reports* 12(6) (2019)  
8 1389-1403.  
9 [47] O.S. Kwon, W. Kim, H.J. Cha, H. Lee, In silico drug repositioning: from large-  
10 scale transcriptome data to therapeutics, *Arch Pharm Res* 42(10) (2019) 879-889.  
11 [48] O.S. Kwon, H. Lee, H.J. Kong, E.J. Kwon, J.E. Park, W. Lee, S. Kang, M. Kim, W.  
12 Kim, H.J. Cha, Connectivity map-based drug repositioning of bortezomib to reverse  
13 the metastatic effect of GALNT14 in lung cancer, *Oncogene* (2020).  
14 [49] J. Liu, J. Lee, M.A. Salazar Hernandez, R. Mazitschek, U. Ozcan, Treatment of  
15 obesity with celastrol, *Cell* 161(5) (2015) 999-1011.  
16

17



1 **Figure legends**

2 **Figure. 1 Target-ability of point mutations causing GNE myopathy by base editors**

3 (A) Graphical description of three different gene editing technologies for generating  
4 point mutations (APOBEC1: cytidine deaminase, UGI: Uracil-DNA glycosylase  
5 inhibitor, TadA: adenine deaminase, TadA\*: evolved TadA) (B) Pie Chart of  
6 distribution of GNE myopathy associated mutations described as pathogenic or likely  
7 pathogenic mutations of 63 patients in ClinVar database  
8 (<https://www.ncbi.nlm.nih.gov/clinvar/>) (C and D) Pie chart of targetability of  
9 mutations for 'wild-type (WT) to mutant' (C) or 'mutant to wild-type (WT)' (D)  
10 modeling by base editors (left), graphical presentation of target-ability of each base  
11 editor (right)

12 **Figure. 2 Efficiency of base editing compared to HDR in hESCs** (A) Graphical  
13 description of site of mutations in the epimerase and kinase domain of human GNE  
14 protein (hGNE2) (left), List of mutations generated by each base editor (right) (B to E)  
15 Target deep sequencing results showing overall base conversion rate of each sequence  
16 by CBE (C to T) and ABE (A to G) (left), Graphical presentation of on-target editing  
17 efficiency of indicated gene editing tools (right) for R160Q (B), I588T (C), V727M (D)  
18 and I329T (E), Target base and PAM sequence is colored in red and green (3'-5')  
19 respectively. (F) mRNA expression of *PPM1D* in wild-type (WT) and *TP53* Knockout  
20 (*TP53* KO) hESCs transfected with sgRNA targeting *CCR5* (sgCCR5) and indicated  
21 gene editing tools (Cas9, CBE, NG-CBE, ABE and NG-ABE) compared to control  
22 (Cont: sgCCR5 only), \*,  $p < 0.05$  (G) Graphical presentation of percentage of live cell  
23 ratio of wild-type (WT) and *TP53* KO hESCs after transfection of sgCCR5 and  
24 indicated gene editing tools, \*\*\*\*,  $p < 0.0001$  (H) Gene editing efficiency of indicated

1 gene editing tools in WT and TP53 KO hESCs on CCR5. Editing efficiencies are  
2 analyzed by target deep sequencing.

3 **Figure. 3 Establishment of GNE myopathy disease models through base editors**

4 (A to D) Sanger sequence of mutants of R160Q (A), I329T (B), I588T (C) and V727M  
5 (D) compared to wild-type (WT), Exons coding UDP-GlcNAc-2-epimerase and  
6 ManNAc kinase domain are colored in blue and in red respectively. Target amino acids  
7 and bases are colored in red.

8 **Figure. 4 Mutation-specific phenotype of GNE myopathy disease models (A)**

9 Microscope images (top) and fluorescent images for OCT4 (bottom) of hESCs of WT  
10 and GNE mutants, DAPI for nuclear counterstaining (B) Fluorescent images of hESCs  
11 of WT and GNE mutants stained with SNA (green) and DAPI for counter nuclear  
12 staining (C) Histogram and (D) bar graph of mean fluorescence intensity (MFI) of SNA  
13 in WT and GNE mutants, \*\*\*,  $p < 0.001$ , \*\*\*\*,  $p < 0.0001$  (E) List of predicted severity,  
14 clinical significance and mean fluorescence intensity of GNE mutants, predicted severe,  
15 medium and mild were colored in red, yellow and green respectively. (F) Mean  
16 fluorescence intensity of SNA of indicated hPSCs lines, \*\*\*,  $p < 0.001$

17 **Figure. 5 Structural analysis predicts mutation-specific hyposialylation (A)**

18 Structures of tetrameric epimerase and dimeric kinase domains of human GNE (PDB  
19 ID 4ZHT and 2YHW, respectively) are shown. Target mutations R160Q (B) and I329T  
20 (C) are found in the epimerase domain, while I588T (D) and V727M (E) are in the  
21 kinase domain. Mutagenesis and rotamer selection were performed using PyMOL, and  
22 mutated residues are indicated in grey. Inter-residue interactions within a distance of  
23 4.1 Å are indicated with dashed lines.

24 **Figure. 6 Mutation-specific drug response of GNE myopathy disease models (A)**

25 Graphical description of biosynthesis of sialic acid and sialylation and roles of GNE

1 protein as UDP-GlcNAc-2-epimerase and ManNAc kinase (B) Fluorescence  
2 microscopic images of GNE mutant hESCs stained with SNA after indicated dose of  
3 ManNAc treatment at day 2 and day 6 (C) Flow cytometry for SNA in GNE mutant  
4 hESCs at 2 days after indicated dose of ManNAc treatment (D and E) Relative mean  
5 fluorescent intensity of SNA at 2 (D) and 6 (E) days after indicated concentration of  
6 ManNAc treatment

7 **Figure. 7 GNE myopathy modeling in myocytes derived from GNE-hESCs** (A)  
8 Schematic diagram of myogenic differentiation from hESCs (B) mRNA expression of  
9 typical markers for skeletal myocytes (left) and pluripotency (right) in WT hESC and  
10 myocytes derived from WT hESCs (C) Fluorescence microscope images for myosin  
11 heavy chain (MHC) in myocytes derived from WT hESCs, DAPI for nuclear  
12 counterstaining (D) Microscope images of myocytes derived from WT and GNE  
13 mutants (scale bar = 80  $\mu$ m) (E) mRNA expression of MYH7 of hESCs, myoblast and  
14 myocytes derived from indicated GNE mutant (F) Mean fluorescence intensity of SNA  
15 in indicated WT and mutant myocytes (G) Relative mean fluorescence intensity of SNA  
16 from myocytes harboring I329T and V727M mutant at 2 days after indicated  
17 concentration of ManNAc treatment

18

19

20

# Graphical abstract

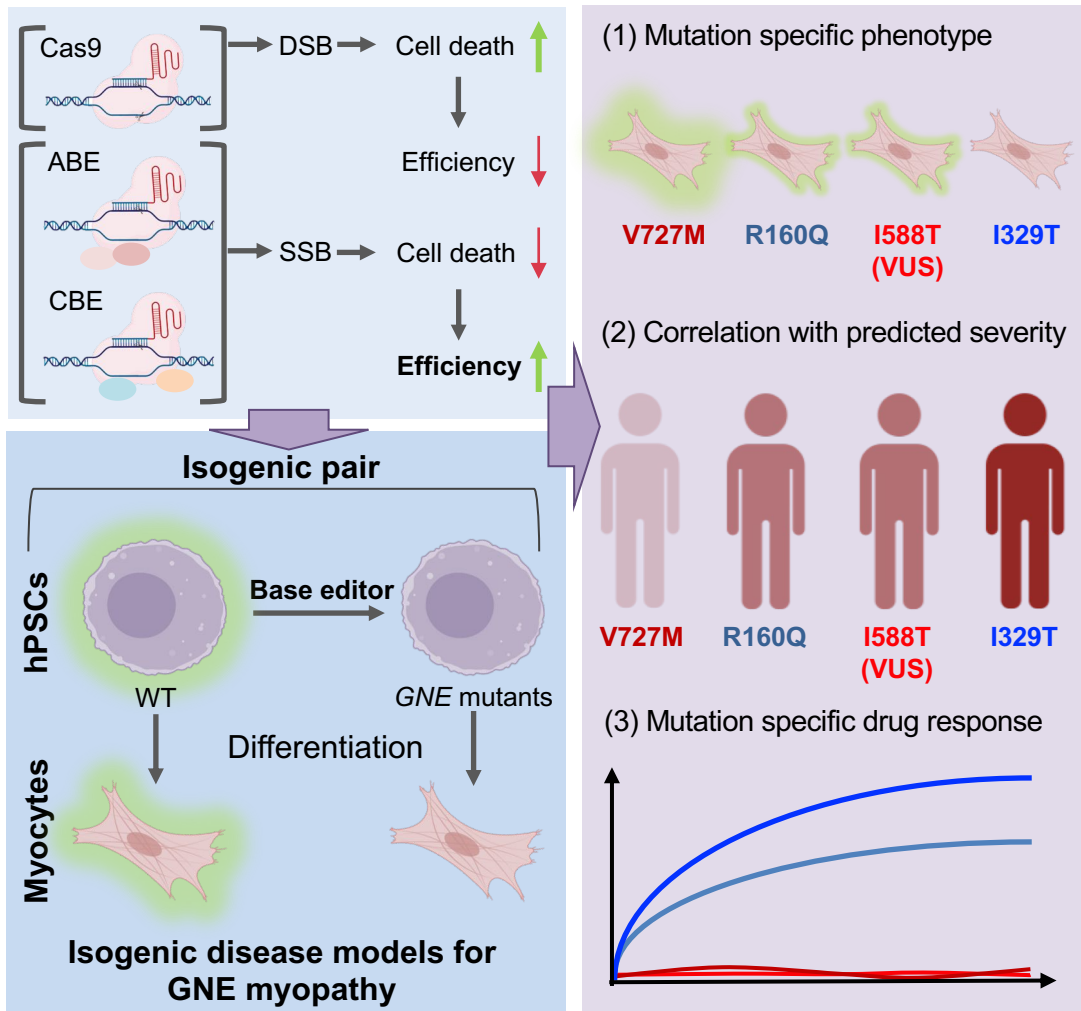

**Figure. 1**

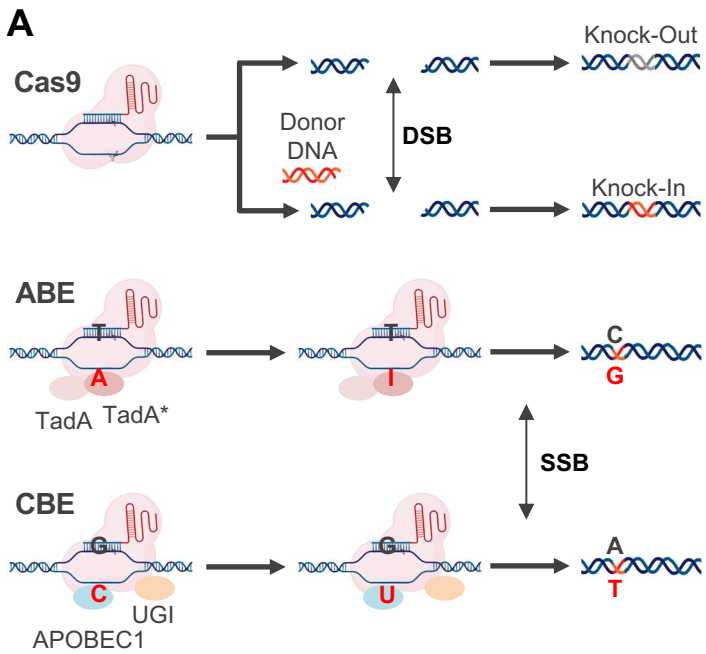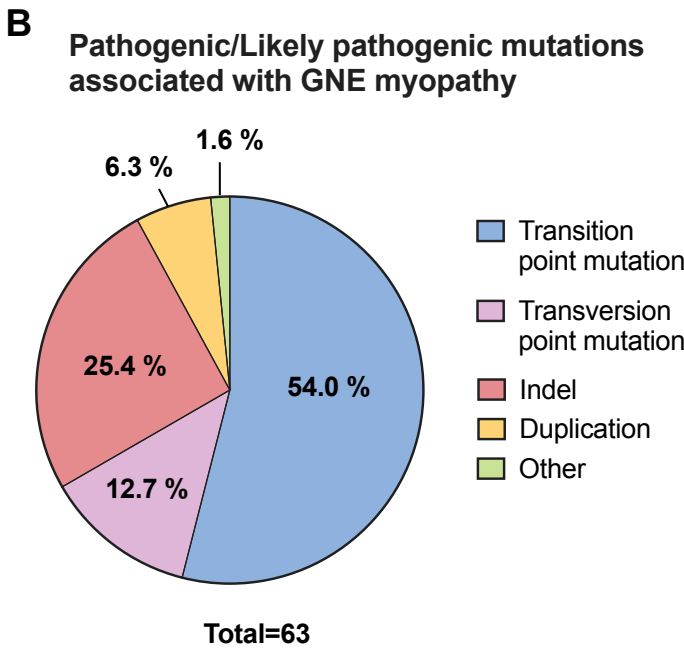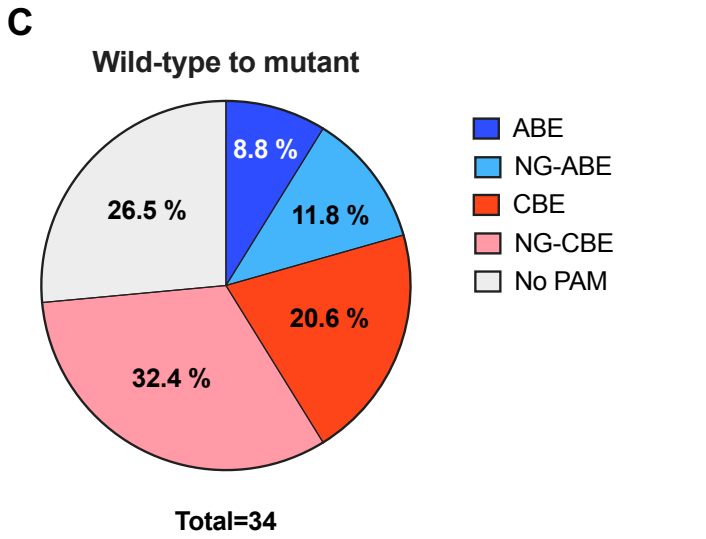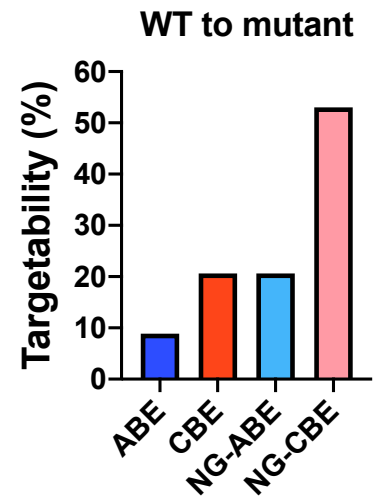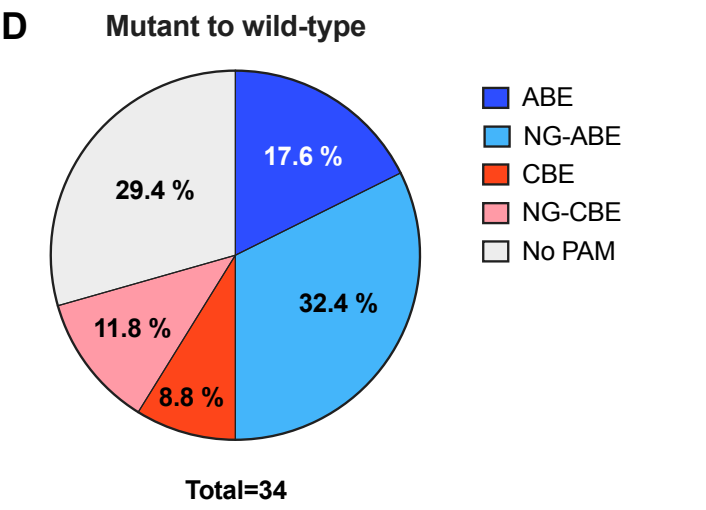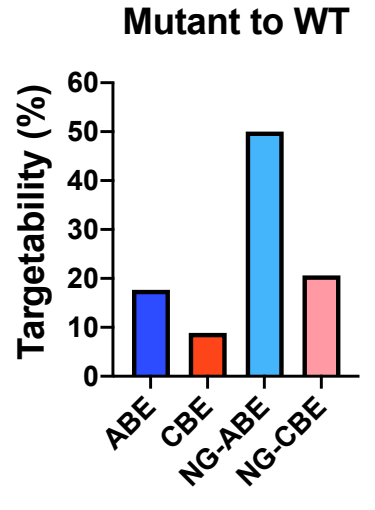

**Figure. 2**

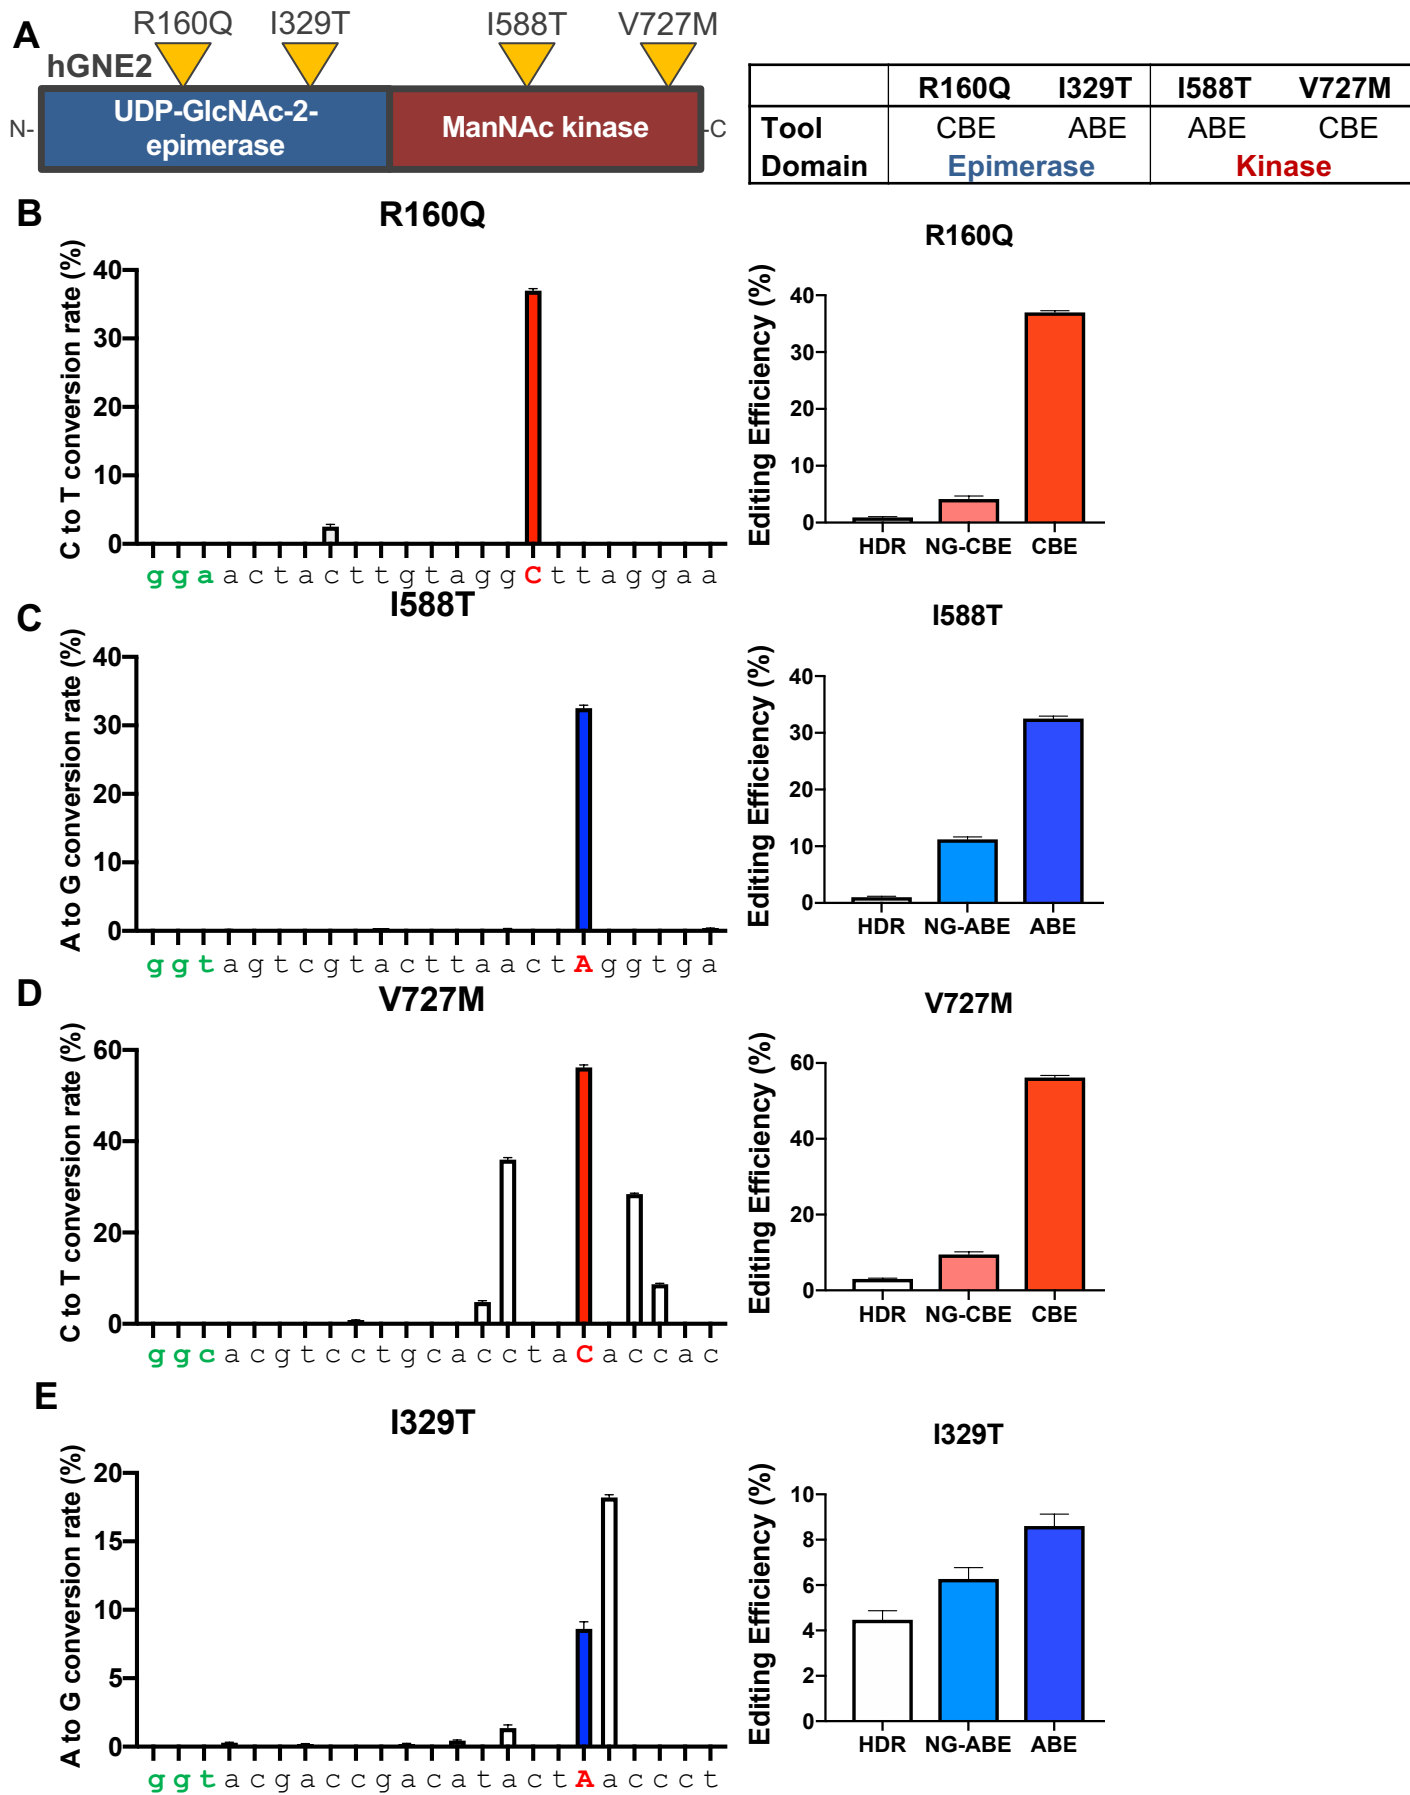

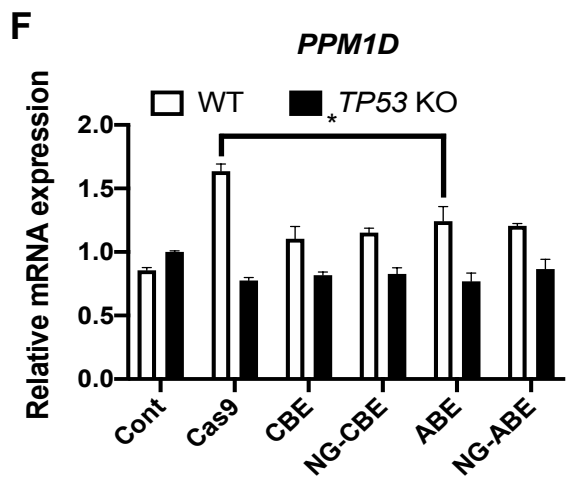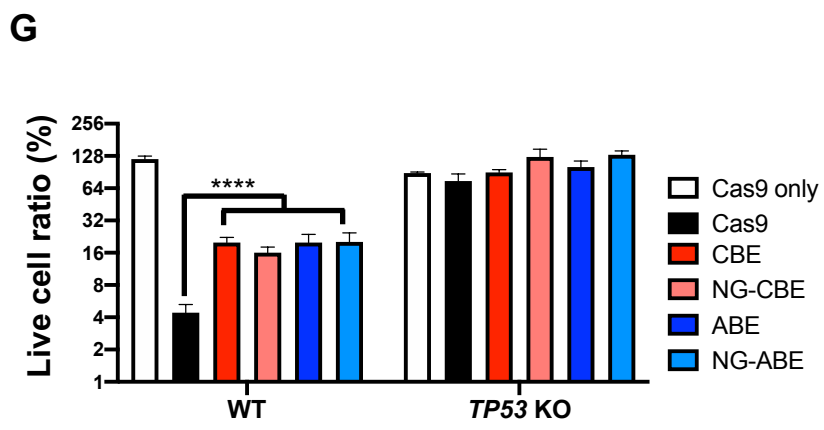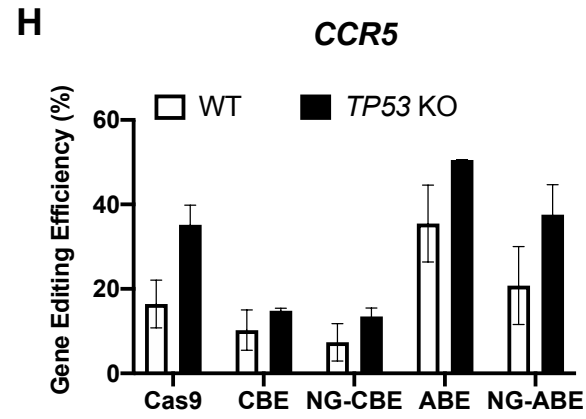

**Figure. 3**

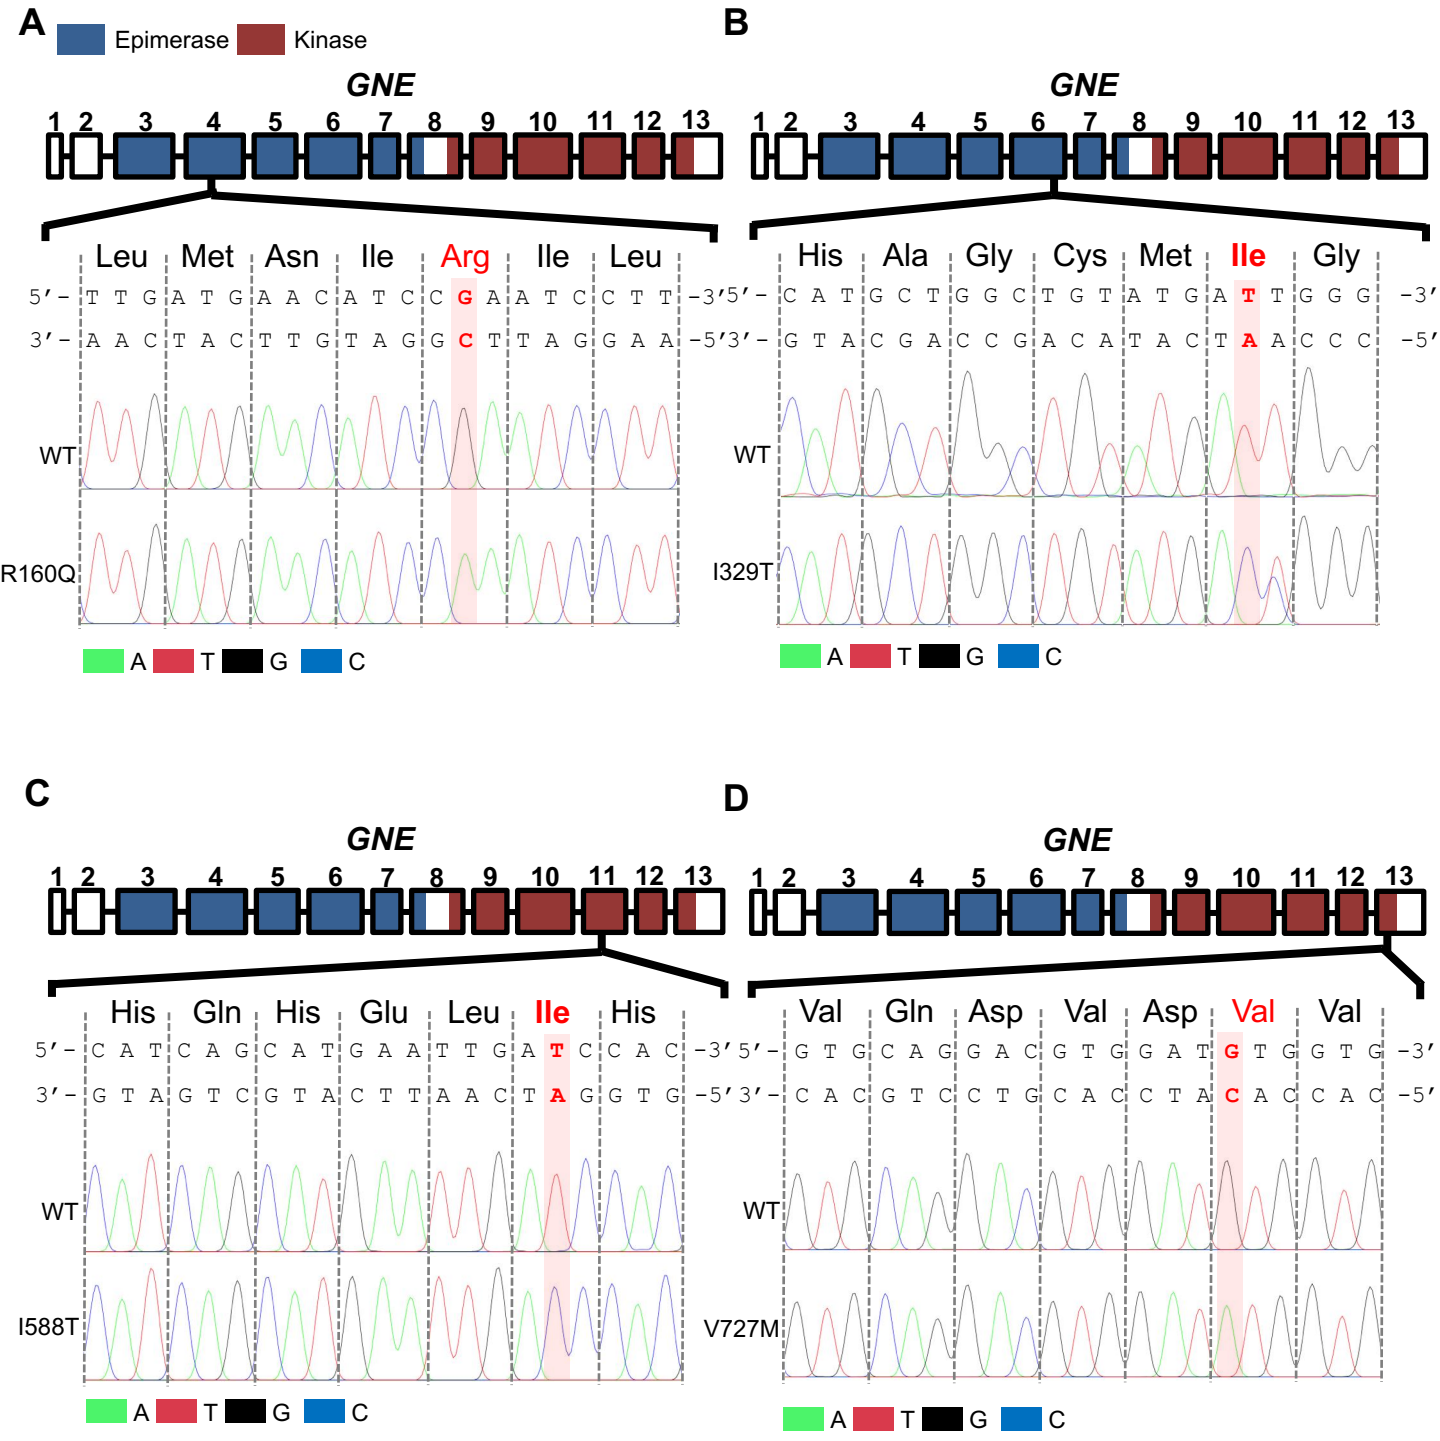



**Figure. 4**

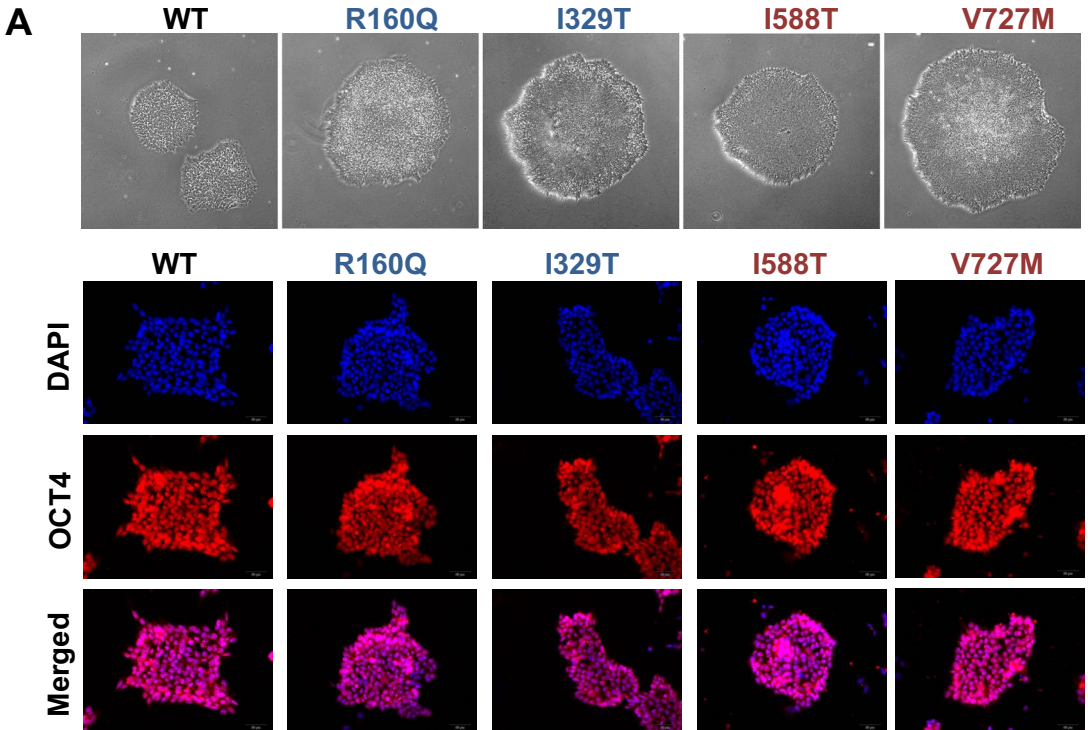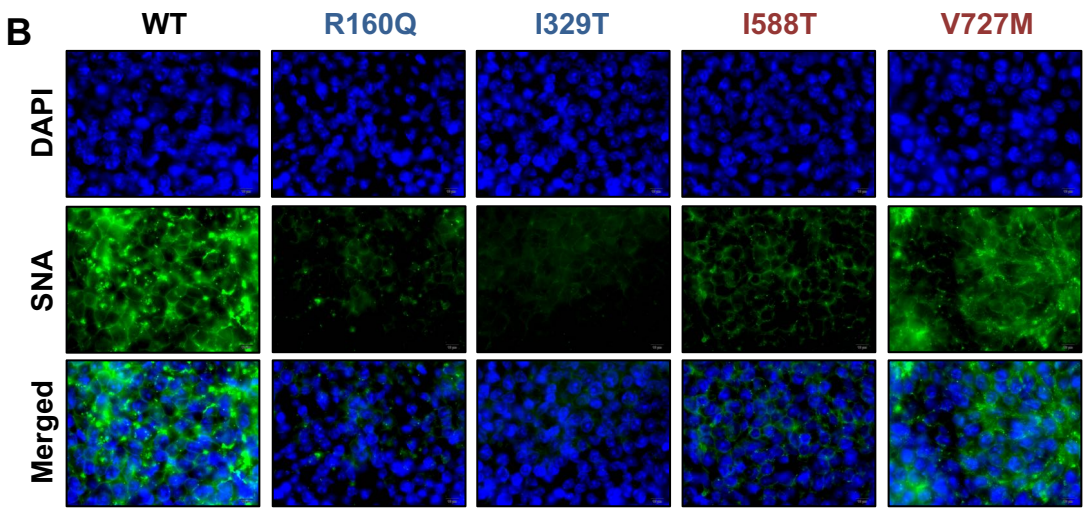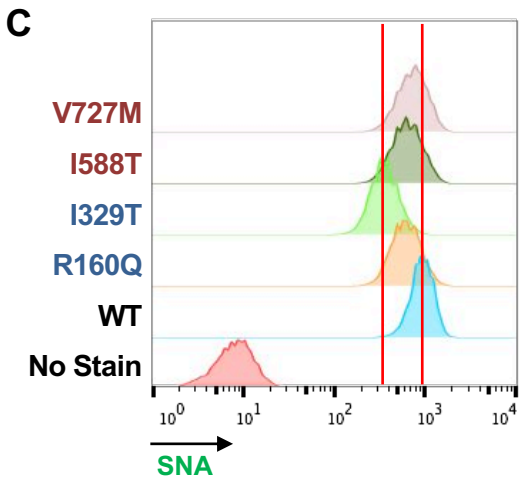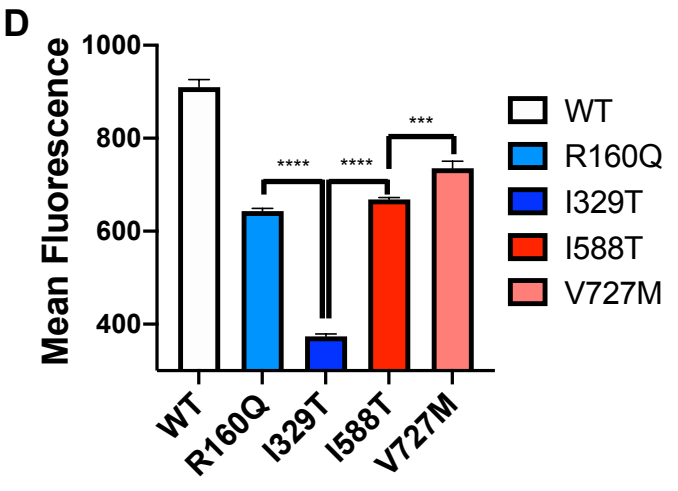

E

| Mutation (hGNE2) | Predicted severity |           |       |              |         | Clinical significance                                                                         | Mean fluorescent intensity |
|------------------|--------------------|-----------|-------|--------------|---------|-----------------------------------------------------------------------------------------------|----------------------------|
|                  | PolyPhen2          | SIFT      | Align | Pmut         | Overall |                                                                                               |                            |
| R160Q            | Probably Damaging  | Tolerated | 35    | Pathological | Medium  | Pathogenic / Likely pathogenic                                                                | 643.5                      |
| <b>I329T</b>     | Probably Damaging  | Damaging  | 65    | Pathological | Severe  | Likely pathogenic                                                                             | <b>374</b>                 |
| I588T            | Possibly Damaging  | Damaging  | 65    | Neutral      | Medium  | Uncertain significance                                                                        | <b>668.3</b>               |
| V727M            | Probably Damaging  | Damaging  | 15    | Neutral      | Medium  | Conflicting<br>( Pathogenic / Likely pathogenic /<br>Likely benign / Uncertain significance ) | 735.3                      |

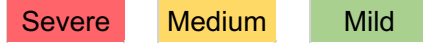

F

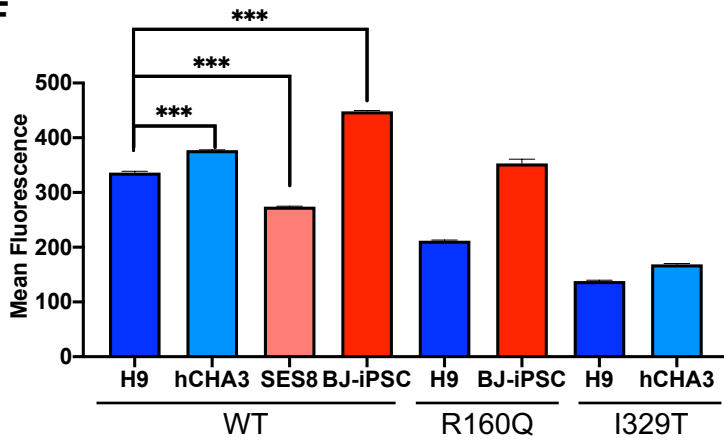

**Figure. 5**

**A**

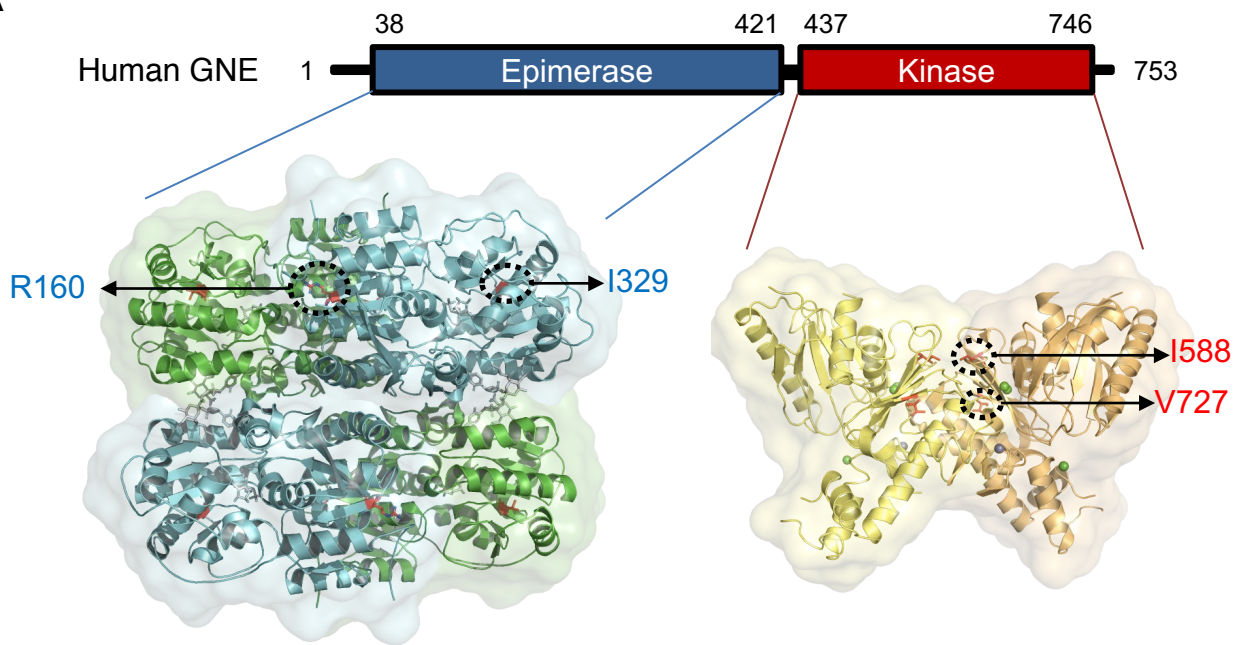

**B**

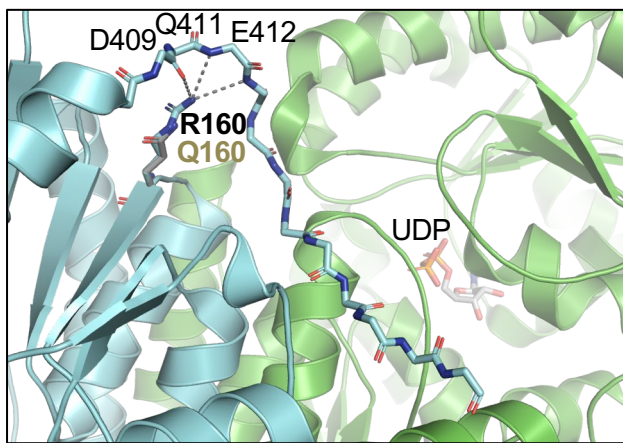

**R160Q**

**D**

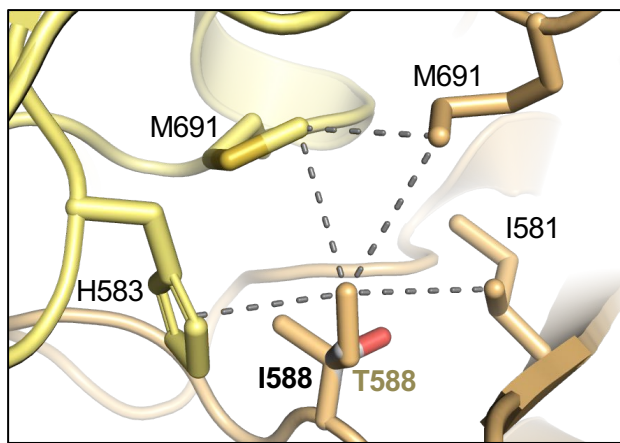

**I588T**

**C**

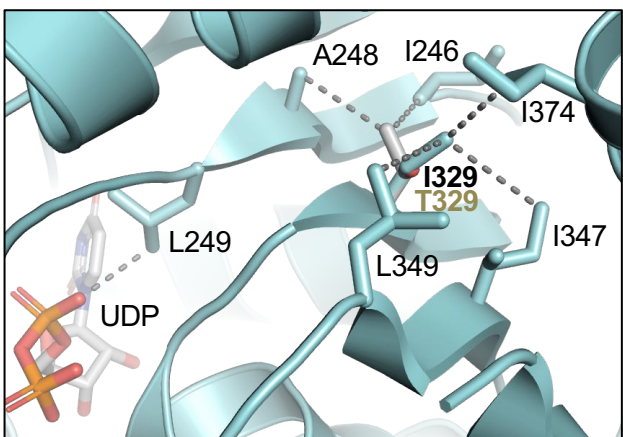

**I329T**

**E**

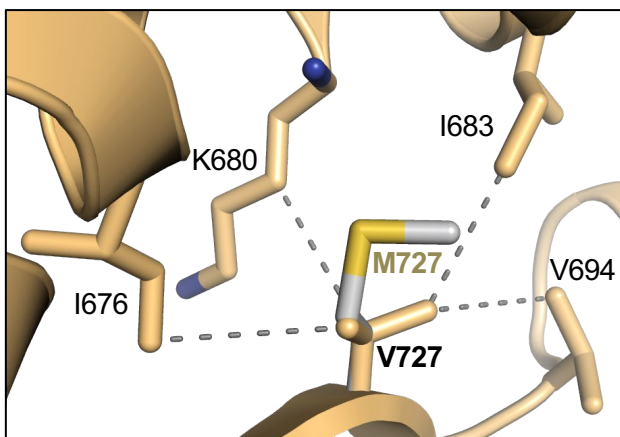

**V727M**



**Figure. 6**

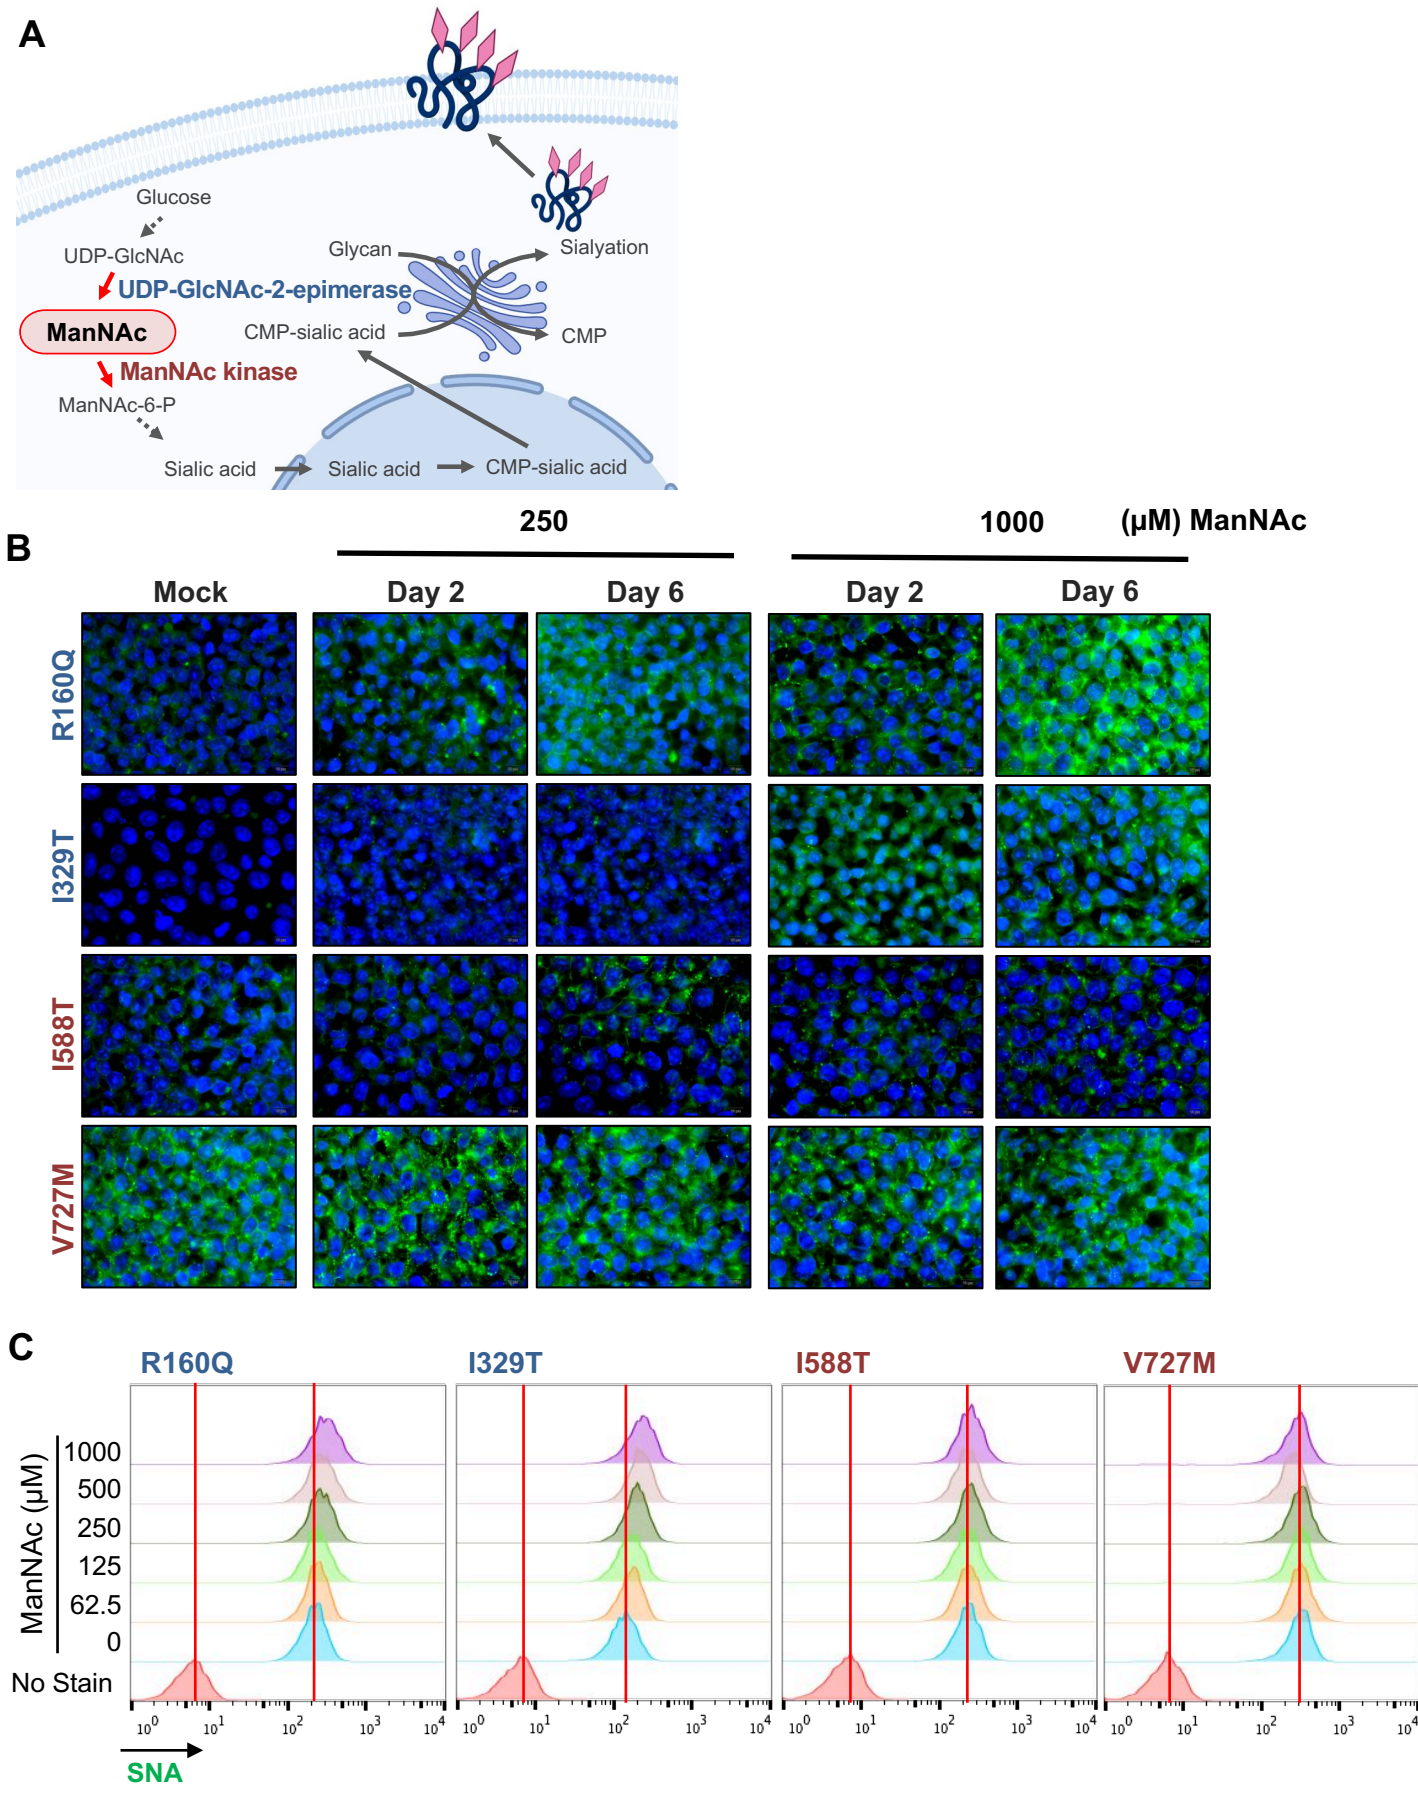

Figure. 6

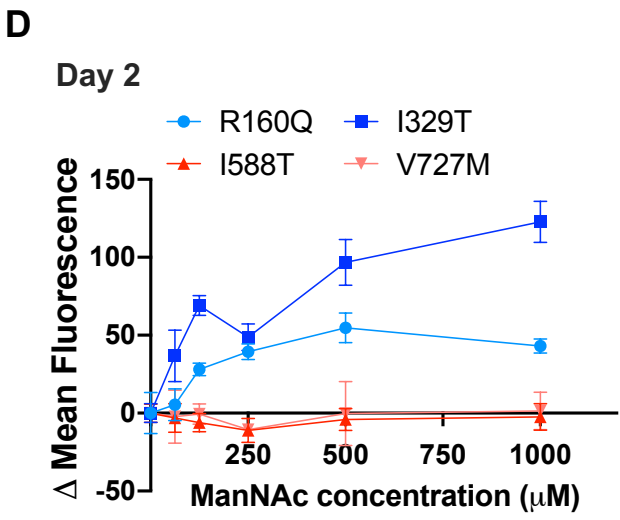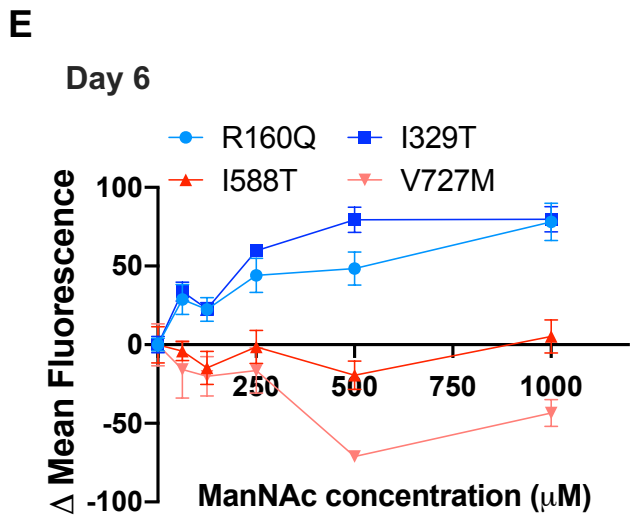

**Figure. 7**

**A**

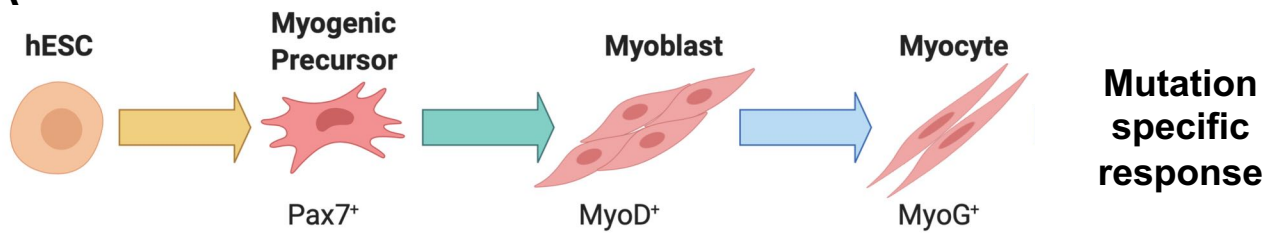

**B**

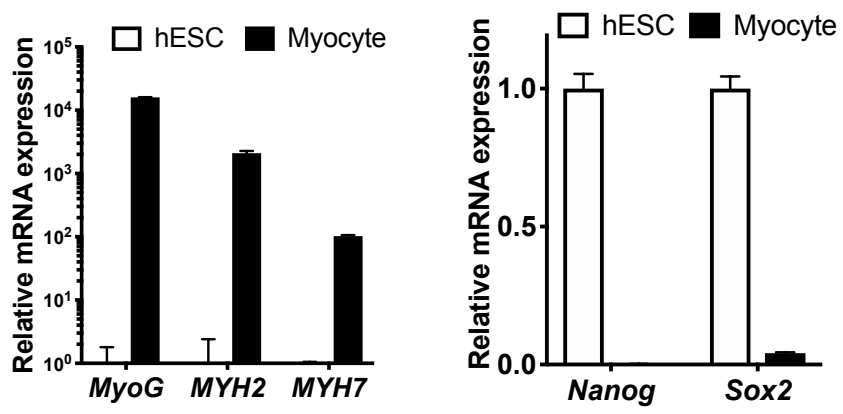

**C**

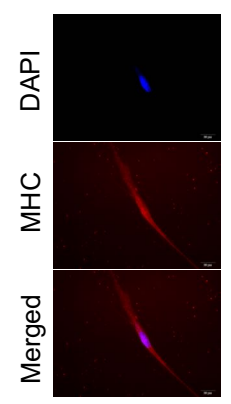

**D**

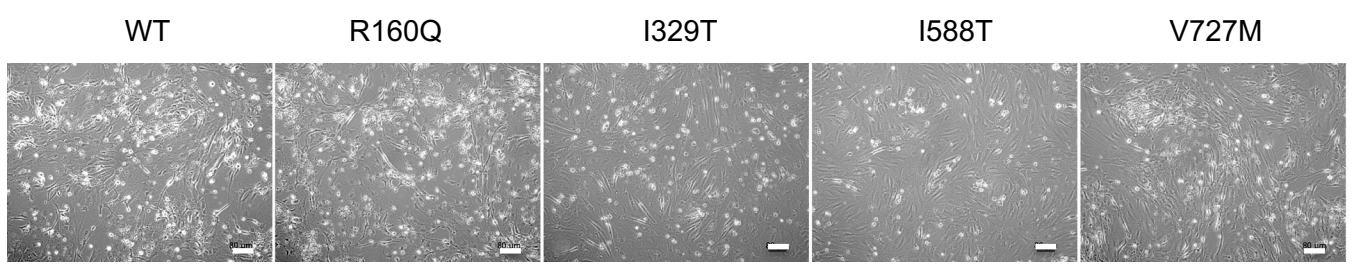

**E**

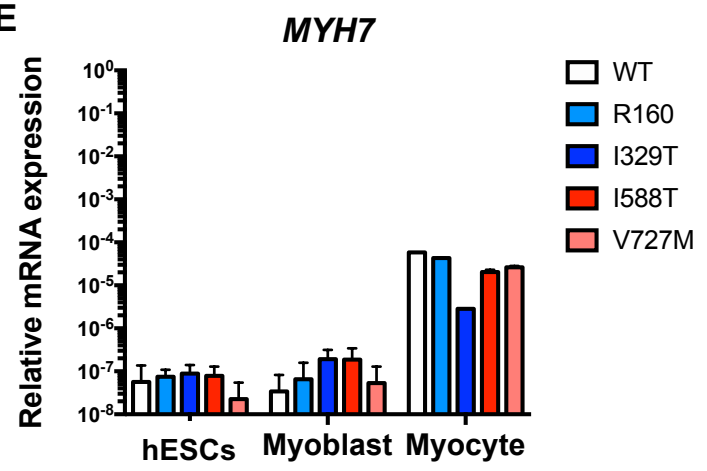

**F**

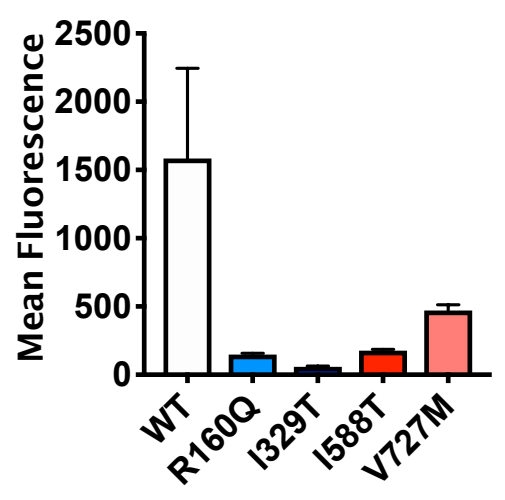

**G**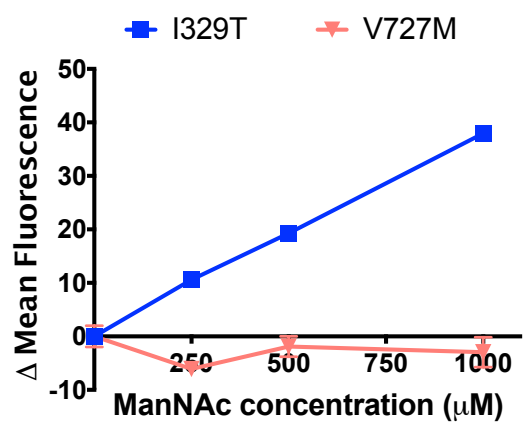

Source: https://biorxiv.org/content/10.1101/2020.11.25.397711v1.full.pdf
